1  
2  
3  
4  
5  
6  
7  
8  
9  
10  
11  
12  
13  
14  
15  
16  
17  
18  
19

**Control of division and microtubule dynamics in *Chlamydomonas* by cyclin B/CDKB1 and the anaphase-promoting complex**

**Kresti Pecani<sup>a</sup>, Kristi Lieberman<sup>a</sup>, Natsumi Tajima-Shirasaki<sup>b</sup>,  
Masayuki Onishi<sup>b</sup> and Frederick R. Cross<sup>a</sup>**

<sup>a</sup>The Rockefeller University, New York, NY, USA 10065

<sup>b</sup>Department of Biology, Duke University, Durham, NC, USA 27708

20

## 21 **ABSTRACT**

22

23 In yeast and animals, cyclin B binds and activates the cyclin-dependent kinase  
24 ('CDK') CDK1 to drive entry into mitosis. We show that CYCB1, the sole cyclin B  
25 in *Chlamydomonas*, activates the plant-specific CDKB1 rather than the CDK1  
26 ortholog CDKA1. Time-lapse microscopy shows that CYCB1 is synthesized  
27 before each division in the multiple fission cycle, then is rapidly degraded 3-5  
28 minutes before division occurs. CYCB1 degradation is dependent on the  
29 anaphase-promoting complex (APC). Like CYCB1, CDKB1 is not synthesized  
30 until late G1; however, CDKB1 is not degraded with each division within the  
31 multiple fission cycle. The microtubule plus-end-binding protein EB1 labeled with  
32 mNeonGreen (EB1-NG) allowed detection of mitotic events in live cells. The  
33 earliest detectable step in mitosis, splitting of polar EB1-NG signal into two foci,  
34 likely associated with future spindle poles, was dependent on CYCB1. CYCB1-  
35 GFP localized close to these foci immediately before spindle formation. Spindle  
36 breakdown, cleavage furrow formation and accumulation of EB1 in the furrow  
37 were dependent on the APC. In interphase, rapidly growing microtubules are  
38 marked by 'comets' of EB1; comets are absent in the absence of APC function.  
39 Thus CYCB1/CDKB1 and the APC mitosis modulate microtubule dynamics while  
40 regulating mitotic progression.

41

42

## 43 **INTRODUCTION**

44

45 Control of the eukaryotic cell cycle has been extensively characterized in animals  
46 and yeast (Opisthokonts), but less is known in other eukaryotes, including the  
47 plant kingdom, which diverged from Opisthokonts early in evolution (Rogozin et  
48 al., 2009). *Chlamydomonas reinhardtii* is a microbial member of the plant  
49 kingdom with unique advantages for studying basic cell biology compared to land  
50 plants: mostly single-copy genes, a simple unicellular life cycle, and facile

51 Mendelian and molecular genetics. Genetic experiments have shown that as in  
52 yeast and animals, cyclin B is essential for cell division, and the anaphase  
53 promoting complex (APC) is essential for anaphase and exit from mitosis (Tulin &  
54 Cross, 2014, Atkins & Cross, 2018). We showed previously that the plant-specific  
55 CDKB1 is the essential CDK for mitotic entry, rather than CDK1/CDKA1 as in  
56 yeast and animals, and CDKB1-associated kinase activity was genetically  
57 dependent on CYCB1 (Atkins & Cross, 2018). Here, we used tagged transgenes  
58 to confirm specific CYCB1-CDKB1 interaction. We developed methods for long-  
59 term time-lapse fluorescent microscopy of single cells, and measured  
60 accumulation and degradation of CYCB1 and CDKB1 through cycles of multiple  
61 fission. In addition, we used mNeonGreen-tagged EB1 (microtubule plus-end-  
62 binding protein) in WT and mutants to understand genetic requirements for  
63 microtubule dynamics and individual steps in mitotic progression.

64

## 65 RESULTS

66

67 **CYCB1 interacts with CDKB1.** B-type cyclins are key regulators of the cell cycle  
68 in animals and in yeast (Morgan, 2007). *Chlamydomonas* has a single essential  
69 cyclin B gene, *CYCB1* (Atkins & Cross, 2018). We constructed a *CYCB1-GFP*  
70 fusion under control of the *CYCB1* promoter, and identified transgene  
71 transformants that rescued ts-lethality of *cycb1-5*. We chose a transformant with  
72 a single GFP-containing locus that efficiently rescued *cycb1-5* in tetrad analysis.  
73 Immunoblotting with anti-GFP revealed a single CYCB1-GFP band, expressed  
74 specifically in dividing cells in partially synchronized cultures (Fig. 1). Inactivation  
75 of either the APC or of CDKB1 (using *cdc27-6* or *cdkb1-1* mutations,  
76 respectively) prevented degradation of CYCB1-GFP at late timepoints (Fig. 1).

77 *In vitro* protein kinase activity toward histone H1 co-immunoprecipitated  
78 with CYCB1-GFP (Fig. 2A). This activity was eliminated in *cdkb1-1 CYCB1-GFP*  
79 cells despite the presence of CYCB1-GFP protein (Fig. 2A). Reciprocally, the  
80 CDKB1-associated kinase activity was genetically dependent on *CYCB1* (Atkins  
81 & Cross, 2018). Kinase activity was increased in *cdc27-6 CYCB1-GFP* cells (Fig.

82 2A); similarly. CDKB1-associated kinase activity was increased in *cdc27-6*  
83 *CDKB1-mCherry* (Atkins & Cross, 2018).

84 Specificity of interactions between cyclins and CDKs in *Arabidopsis* has  
85 been inconclusive. Comprehensive proteomics with tagged proteins showed that  
86 cyclin B bound specifically to CDKB and not CDKA (Van Leene et al., 2010);  
87 however, Boruc et al., 2010 showed by binary interaction assays that CDKB and  
88 CDKA both have the capacity to bind CYCBs and CYCAs. We constructed  
89 *Chlamydomonas* CYCB1-GFP strains co-expressing CDKA1-mCherry or  
90 CDKB1-mCherry. Anti-GFP immunoprecipitation specifically co-precipitated  
91 CDKB1-mCherry but not CDKA1-mCherry (Fig. 2B). This finding contrasts with  
92 the specificity of Opisthokont cyclin B to the CDKA1 ortholog CDK1.

93 Overall, these data suggest that early in the evolution of the plant lineage,  
94 the plant-specific CDKB1 took over the role of inducing mitotic progression in  
95 response to cyclin B accumulation. Experiments in the microalga *Ostreococcus*  
96 also support this idea (Corellou et al., 2005).

97

### 98 **Cyclin B accumulation and degradation through multiple fission.**

99

100 *Chlamydomonas* exhibits a pattern of cell division called ‘multiple fission’  
101 (Cross & Umen, 2015). Newborn cells are small, and can grow over a 10-12 hr  
102 period to >10-fold starting size without DNA synthesis or cell division. Cells then  
103 resorb flagella and undergo multiple rapid cell divisions: complete rounds of DNA  
104 replication, nuclear division and cytokinesis, all within the mother cell wall, until  
105 progeny cells have divided to approximately their starting size (Cross & Umen,  
106 2015). Divisions require ~30 min and are highly synchronous synchronous  
107 among the descendants of a single cell, which are retained within within the  
108 mother cell wall until hatching occurs after the terminal cell division (Cross &  
109 Umen, 2015).

110 The Western blot data above showed approximate restriction of cyclin B  
111 accumulation to the multiple fission period. However, synchrony is not good  
112 enough to resolve individual divisions in bulk culture, preventing determination of

113 whether cyclin B was stable throughout the period of multiple fissions, or was  
114 degraded in each division and then resynthesized.

115 To solve this problem, we developed methods for long-term time-lapse  
116 fluorescence microscopy of *Chlamydomonas*. This required maintenance of tight  
117 temperature regulation of cells being imaged, preventing cells swimming out of  
118 the field of view, providing light for photosynthesis between image acquisitions,  
119 and computational subtraction of autofluorescence from chloroplasts, which  
120 otherwise swamped the CYCB1-GFP signal. Our solutions included small,  
121 individually-sealed acrylic chambers filled with TAP/agarose, each containing a  
122 different cell population; overhead illumination provided by small LEDs, which  
123 were programmed to turn on after image acquisition was complete, and turn off  
124 before the start of the next frame; and computational deconvolution to eliminate  
125 contribution of chloroplast autofluorescence. See time lapse microscopy method  
126 #1 in Methods section for complete details.

127 CYCB1-GFP signal was first detectable ~0.5-1 hr before the first division  
128 (Fig. 3; Supp. Video 1); signal increased steadily for approximately 20 min. We  
129 then observed sharp reduction to near-background levels of the signal 3-6 min  
130 (1-2 frames) before cell division (scored by formation of a cleavage furrow in a  
131 concurrent brightfield image; arrows in Fig. 3, Supp. Video 1). From the shape  
132 and position of the signal we assume CYCB1-GFP is nuclear-localized.

133 From multiple movies, we estimate a half-life of nuclear CYCB1-GFP of  
134 approximately 3-5 minutes, specifically during an interval of ~5-10 min preceding  
135 cell division. CYCB1-GFP then reaccumulates, but only in cells destined to  
136 undergo an additional division cycle. This indicates that the 'decision' to divide is  
137 upstream of CYCB1 accumulation. We don't have an estimate for the half-life of  
138 CYCB1-GFP during the reaccumulation phases, but the protein accumulates in a  
139 linear fashion for at least 0.5 hr, suggesting a half-life at least this long.

140 Newly accumulated CYCB1-GFP in later division cycles is sometimes  
141 clearly separated into 2 (2<sup>nd</sup> division) or 4 (3<sup>rd</sup> division) foci, which we presume  
142 corresponds to separate accumulation in different daughter nuclei. This is not  
143 always clearly observed; we don't know if this is due to specifics of nuclear

144 localization within daughter cells or to complexity of the multiply divided cells'  
145 geometry observed at a single focal plane.

146

147 **Cyclin B proteolysis is dependent on APC and on CDKB1.** APC-dependent  
148 ubiquitination and proteolysis is frequently dependent on a 'destruction box'  
149 consensus sequence in the target protein (He et al., 2013). CYCB1 contains a  
150 consensus destruction box (Atkins & Cross, 2018). Using *cdc27-6*, a tight  
151 temperature-sensitive allele of a core APC subunit (Atkins & Cross, 2018), we  
152 found that CYCB1-GFP proteolysis was dependent on the APC (Fig. 4): CYCB1-  
153 GFP levels were low at early times, and rose at similar times to WT, but unlike in  
154 WT, no precipitous degradation was observed even after many hours.

155 We also found that CYCB1-GFP levels remained high in a *cdkb1-1*  
156 background (Supp. Fig. 1, Supp. Video 2). This observation could be explained in  
157 two ways: (1) Degradation might be restricted to CYCB1 in a complex with  
158 CDKB1. (2) CYCB1-CDKB1 might be required to activate the APC. The former  
159 may be unlikely since in other organisms, APC-dependent degradation generally  
160 transfers with the destruction box, even if appended to reporters (Glotzer et al.,  
161 1991). The latter mechanism could be consistent with results in animal cells,  
162 APC-Cdc20 activation is dependent on cyclin B-Cdk1 phosphorylation of APC  
163 subunits (Zhang et al., 2016). The mechanism is complex: recruitment of Cks1-  
164 CDK-cyclin to a disordered region of APC3, promoting phosphorylation of a  
165 segment of APC1 that occludes the Cdc20 binding site; phosphorylated APC1  
166 does not occlude the site and Cdc20 is recruited (Zhang et al., 2016). The  
167 regions and phospho-sites in human APC3 and APC1 identified as critical for this  
168 mechanism align poorly or not at all to the *Chlamydomonas* homologs, so if a  
169 similar mechanism is operating, it is working with divergent sequences. We have  
170 observed complete synthetic lethality at permissive temperature in tetrad analysis  
171 between temperature-sensitive mutations in *CDC20* and *CKS1* (Breker et al.,  
172 2018; unpublished data), suggesting some collaboration between CDC20 and  
173 CKS1, but we have no information specifically connecting this to CDC20  
174 activation by CDK beyond the ability of CKS1 to bind CDKB.

175

176 **Is Cyclin B degradation essential?** In yeast and animals, cyclin B degradation  
177 is essential for completion of cytokinesis and for initiation of a new round of DNA  
178 replication (Murray & Kirschner, 1989; Wäsch & Cross, 2002). In yeast, this  
179 requirement for cyclin B degradation is specific to the Clb2 B-type cyclin; mitotic  
180 exit proceeds even without the destruction of another B-type cyclin, Clb3, and the  
181 degradation of Clb3 is not essential for viability (Pecani & Cross, 2016). In  
182 *Nicotiana tabacum*, expression of non-degradable CYCB1 leads to endomitosis  
183 with failed cytokinesis (Weingartner et al., 2004). We therefore tested whether  
184 destruction of CYCB1 is essential in *Chlamydomonas*.

185 We constructed a *CYCB1-db-GFP* transgene with the destruction box  
186 deleted, and transformed it into a *cycb1-5* temperature-sensitive strain in parallel  
187 with wild-type *CYCB1-GFP*, selecting at 33 degrees for rescue of *cycb1-5*. In  
188 three independent experiments, each with hundreds of rescue events by WT  
189 *CYCB1-GFP*, we obtained no rescue upon electroporation with similar amounts  
190 of *CYCB1-db-GFP* (data not shown). This result is consistent with lethality of  
191 *CYCB1-db*. We cannot rule out the possibility that the CYCB1 destruction box is  
192 required for positive function of CYCB1; this has not been observed in other  
193 systems, however, and the destruction box is far from the cyclin regions  
194 responsible for CDK activation and substrate targeting. At any rate, these results  
195 indicate that the destruction box in CYCB1 is essential for its function.

196

197 **Regulation of CDKB1.** We reported previously that CDKB1-mCherry  
198 accumulated in the nucleus of cells during the multiple fission period (Atkins &  
199 Cross, 2018); however, we were unable to resolve whether CDKB1-mCherry was  
200 degraded and then resynthesized in each cell cycle. We constructed a CDKB1-  
201 Venus transgene, and used it to rescue a *cdkb1-1* strain. In time lapse  
202 microscopy of rescued cells, we observed CDKB1-Venus accumulation tightly  
203 specific to the period of the multiple fission cycle, consistent with previous results  
204 (Atkins and Cross, 2018). However, there was no loss of total CDKB1-Venus  
205 signal within the individual divisions, unlike the behavior of CYCB1-GFP (Fig. 5).



206           Although CDKB1-Venus signal quantified over the entire cell remained  
207 high through multiple division cycles, the local intensity of the nuclear signal  
208 varied through the cell cycle, reaching a peak about 6 min before division (Fig.  
209 5). The timing of more intense CDKB1-Venus localization approximately  
210 corresponds to the timing of CYCB1 accumulation. We speculate that efficient  
211 nuclear localization of CDKB1 may require CYCB1.

212           After completion of the terminal cell division, CDKB1-Venus remained  
213 diffuse and disappeared over the succeeding ~1 hr, suggesting that CDKB1  
214 degradation might be dependent on exit from the multiple fission period.

215

216   **Live-cell imaging with EB1-mNeonGreen reveals regulation of microtubule**  
217 **and spindle dynamics.** Cytoplasmic microtubules in *Chlamydomonas* are of two  
218 types. There are very stable ‘rootlets’ forming a cruciate structure centered on  
219 the basal bodies, containing acetylated tubulin (Ehler et al., 1995; Janke &  
220 Montagnac, 2017). In addition, there are unacetylated and highly dynamic  
221 ‘cytoplasmic microtubules extending from the vicinity of the basal bodies and  
222 rootlets and forming a cup-shaped pattern with the basal bodies as the base’  
223 (Ehler et al., 1995). The plus-end-binding protein EB1-mNeonGreen (EB1-NG) is  
224 located in one or two anterior spots at or near to the flagellar basal bodies (Harris  
225 et al., 2016; Onishi et al., 2020), and moving EB1-NG ‘comets’ extend along the  
226 cell cortex to the cell posterior (Harris et al., 2016; Onishi et al., 2020). These  
227 EB1 comets likely track the ends of the dynamic cytoplasmic microtubules, rather  
228 than rootlets, because EB1 preferentially binds near the plus end of unstable,  
229 growing microtubules (Akhmanova & Steinmetz, 2008). Moreover, in dividing  
230 cells, EB1-NG colocalizes with the spindle and the cleavage furrow (Onishi et al.,  
231 2020), making it a marker to monitor mitotic events that may be controlled by  
232 CDKB1/CYCB1.

233           We used two different imaging methods to precisely record the behavior of  
234 EB1-NG in dividing wild-type and mutant cells. In method 1, we used 3-min  
235 intervals with single Z-planes to avoid phototoxicity, and the precise temperature  
236 control to image ts-lethal mutants through multiple division cycles, as described



237 above in detail. Method 1 was also used for a movie with 20-sec intervals. In  
238 method 2, we used 10-sec intervals with single Z-planes to examine EB1-labeled  
239 structures that are near the medial plane (anterior spots, spindle, and furrow) in  
240 the first division of a multiple fission cycle (as described previously [Onishi et al.,  
241 2020]).

242 As cells enter mitosis, the polar ‘spot’ of EB1 signal splits into two; the two  
243 spots move slightly into the cell interior and mark foci that nucleate formation of a  
244 bipolar spindle about 4 min after pole splitting (Table 1, Figures 6 and 7, Supp  
245 Videos 3 and 4). Supp. Video 3 shows the process of pole splitting, spindle  
246 formation, anaphase and cytokinesis all marked by EB1-NG, at 10-sec time  
247 resolution in the first division cycle. Supp Video 4, at 3-min resolution, shows the  
248 same sequence repeating in three sequential divisions. (As noted in Methods,  
249 the higher time resolution resulted in sufficient irradiation of the cells that viability  
250 was lost; after the first division, additional divisions were rarely observed.  
251 Irradiating only every 3 min seemed to give division kinetics and numbers similar  
252 to those of unirradiated cells. Supp. Video 4 shows the high degree of synchrony  
253 of successive divisions, and the reliable appearance of the cytokinetic furrow at  
254 right angles to the dissociated spindle).

255 The spindle structure has a ~4 min lifetime, then disappears; signal  
256 remains at approximately the position of the spindle midzone, and this signal  
257 rapidly elongates perpendicular to the spindle axis (Figs. 6 and 7; Supp Videos 3  
258 and 4). This line of EB1 signal is detected coincident with a cleavage furrow  
259 (detectable in a paired brightfield image), perpendicular to the former spindle  
260 axis. EB1 signal and the cleavage furrow extend essentially together in space  
261 and time (Fig. 7). This likely reflects growth of the microtubule array called the  
262 ‘phycoplast’, which marks (and is probably required for) cleavage furrow  
263 development (Ehler & Dutcher, 1998; Onishi et al., 2020). The four-membered  
264 rootlet microtubules run adjacent to the cytoplasmic microtubules in this array  
265 (Ehler et al., 1995), and may dictate its location (Ehler et al., 1995; Ehler &  
266 Dutcher, 1998).

267

| Event/Frame-rate | 10 sec  | 20 sec           | 3 min         |
|------------------|---------|------------------|---------------|
| Pole sep → SP1   | 3.3 (1) | 4 +/- 1 (14)     | ND            |
| SP1 → SP1B       | 3.8 (1) | 3.7 +/- 0.7 (16) | 3 +/- 1 (30)  |
| SP1B → CF1       | ND      | ND               | 1 +/- 1 (24)  |
| SP1 → SP2        | ND      | ND               | 37 +/- 3 (18) |
| SP2 → SP2B       | ND      | ND               | 2 +/- 1 (28)  |
| SPB2 → CF2       | ND      | ND               | 2 +/- 2 (20)  |
| SP2 → SP3        | ND      | ND               | 41 +/- 5 (15) |
| SP3 → SP3B       | ND      | ND               | 3 +/- 1 (25)  |
| SP3B → CF3       | ND      | ND               | 2 +/- 2 (23)  |

268

269

270 Table 1. Timing of EB1-scorable mitotic events. Time lapse movies at varying  
271 frame-rates (top row) were analyzed manually, and mean and standard deviation  
272 of time intervals is presented (all in minutes). 'Pole sep': separation of the  
273 anterior EB1 signal into two separate foci. 'SP1, SP2, SP3': full formation of  
274 bipolar spindle in 1<sup>st</sup>, 2<sup>nd</sup>, 3<sup>rd</sup> rounds of division. A spindle was scored when the  
275 EB1-NG signal was continuous across the midline of the cell, and the orientation  
276 of the signal was roughly perpendicular to the following cleavage furrow. 'SP1B,  
277 SP2B, SP3B': spindle breakdown 1<sup>st</sup>, 2<sup>nd</sup>, 3<sup>rd</sup> rounds of division. Spindle  
278 breakdown was scored when the EB1-NG signal was no longer perpendicular to  
279 the following cleavage furrow. Spindle formation and breakdown were highly  
280 synchronous in progeny within a single cell, although not all spindles were in  
281 focus in every division. To calculate the spindle duration, or SP to SPB, the  
282 frame number of the first visible spindle was subtracted from the frame number of  
283 the start of the spindle breakdown, and then multiplied by the frame frequency.  
284 In cases where a spindle was not visible in any frame it was given a value of 0  
285 frames, but only if the preceding PS was clearly visible; in these cases, it was  
286 assumed that the spindle was likely missed because it was not present at the  
287 times the images were captured. If neither the PS nor the SP were seen, the  
288 values were not recorded. 'CF1, CF2, CF3': detectable cleavage furrow

289 initiation in 1<sup>st</sup>, 2<sup>nd</sup>, 3<sup>rd</sup> rounds of division (for later divisions, furrow formation in  
290 any progeny cell was counted due to image complexity). A CF was scored when  
291 a visible indent was observed in the cell membrane that was contiguous with the  
292 upcoming plane of separation of the cells. The 10-sec framerate movie was at  
293 26°C; the 20-sec and 3-min movies were at 33°C. Entries are in minutes: mean  
294 +/- standard deviation (number of cells). ND: not determined, for the following  
295 reasons: (1) 10 and 20 sec framerates were only usable for the first division, as  
296 cell viability dropped from light exposure; (2) cleavage furrow formation was  
297 scored from brightfield images that were captured only at 3 min resolution.  
298 Effective detection of pole separation was difficult at 3 min resolution because it  
299 was easiest to observe when moving density could be compared between  
300 adjacent frames. Only the later phases of the PS were easily seen once the  
301 poles were separated and very bright. Therefore, this was not scored in the 3  
302 min framerate movies. See Figures 6 and 7 and Supp. Videos 3 and 4 for  
303 illustrative examples.

304

305         Since formation of a cleavage furrow detectable in brightfield almost  
306 invariably occurs in the 3-min frame following spindle detection (Table 1), and  
307 CYCB1-GFP degradation tightly correlates with cleavage furrow formation (see  
308 above), these combined results suggest near-simultaneous spindle breakdown  
309 and CYCB1 degradation followed by cleavage furrow formation.

310         In multiple fission, additional cell division cycles occur within the same  
311 mother cell wall. These cycles are rapid and regularly spaced (Table 1). We  
312 almost invariably observe simultaneous appearance in the 2<sup>nd</sup> division of two  
313 bipolar spindles, which disappear in the next frame replaced by two lines of EB1  
314 signal perpendicular to the long axes of the spindles, and in most cells cleavage  
315 furrows were detectable in that same frame (Fig. 7, Supp. Video 4). In favorable  
316 3<sup>rd</sup>-division cells, similar observations can be made of four bipolar spindles (Fig.  
317 7). We expect that this reflects similar microtubule and EB1 behavior in the later  
318 divisions to what was observed in the first. However, at 3-min the frame  
319 resolution is close to the interval between pole splitting and spindle formation,

320 and between spindle formation and breakdown; as a consequence in a sizable  
321 fraction of cells we observe pole splitting or spindle formation, but not both.

322 With a clear picture of the events and timing of EB1-labeled mitotic events  
323 in wild-type, we wanted to determine where various mutants were blocked in the  
324 progression. In *cycb1-5* cells expressing EB1-NG (Fig. 8, Supp. Video 5), we  
325 observed only the anterior spot of EB1-NG signal, as in WT G1 cells, even at  
326 long incubation periods (when WT cells have almost all divided). The polar  
327 splitting event was not observed.

328 To ask whether aspects of the *cycb1-5* phenotype might be due to failure  
329 to activate APC, we next turned to ts-lethal mutants of two genes required for  
330 APC function: *CDC27*, an essential core subunit of APC itself, and *CDC20*, an  
331 activator of APC. In both mutant backgrounds, cells expressing EB1-NG at  
332 restrictive temperature underwent the polar splitting reaction followed by efficient  
333 bipolar spindle formation (Figs. 9 and 10, Supp. Videos 6 and 7). Once formed,  
334 the spindle was stable, lasting for many hours (in contrast to ~4 min in WT),  
335 consistent with previous observations with anti-tubulin immunofluorescence  
336 (Atkins & Cross, 2018). No cytokinetic cleavage furrow formed; correlated to this,  
337 there was no EB1-NG signal aligned perpendicular to the spindle long axis.

338 *Chlamydomonas* has a gene orthologous to the *CDC20* homolog *CDH1*,  
339 which in other organisms can also activate the APC. The largely consistent  
340 results with EB1 comparing *cdc20-1* and *cdc27-6* mutants suggest that these  
341 phenotypes are due to loss of the APC<sup>CDC20</sup> complex, and that *Chlamydomonas*  
342 CDH1 is unable to fully substitute for CDC20. This is also true in yeast and  
343 animals, owing at least in part to CDK-dependent inhibition of CDH1-APC  
344 (Zachariae & Nasmyth, 1999).

345 In interphase, EB1-NG is associated with ‘comets’ that move from the  
346 anterior along the cortex to the posterior (Harris et al., 2016), presumably  
347 marking rapid microtubule growth. These comets disappear for a very brief  
348 interval exactly coincident with presence of a spindle (Fig. 11A, C; Supp. Fig. 3).  
349 In *cdc20-1* cells the spindle is stable, and comet suppression is permanent (Fig.

350 11B, D). This suggests APC-Cdc20-dependent degradation of an inhibitor of  
351 comet formation.

352

353 **Simultaneous localization of CYCB1 and EB1.** To examine if there is  
354 colocalization between CYCB1 and EB1, we constructed a CYCB1-GFP EB1-  
355 mScarlet strain and observed the first division with live cell microscopy  
356 (microscopy method #3 with z-stacks). The localization of EB1-mScarlet is similar  
357 to what was observed above with EB1-NG: a polar signal splits into two as cells  
358 enter mitosis, and a bipolar spindle is formed from these two spots; the spindle  
359 then disappears and EB1 collects along the cleavage furrow (Figs. 6, 12; Onishi  
360 et al. 2020).

361 CYCB1-GFP signal is briefly concentrated at or just adjacent to the EB1  
362 foci, just before spindle formation (Fig. 12, timepoints 18-20 min; Supp. Video 8).  
363 This places CYCB1-GFP at or near the future spindle poles. As the spindle  
364 breaks down, CYCB1-GFP shows transient localization to a band at the  
365 approximate location of the former spindle midzone; CYCB1-GFP is then  
366 completely degraded. Thus CYCB1 degradation and spindle breakdown are  
367 nearly simultaneous, in agreement with our conclusions comparing separate  
368 CYCB1-GFP and EB1-NG movies (see above).

369 The genetic requirement for CYCB1 for spindle formation, and the  
370 localization of CYCB1 to spindle poles just before spindle formation, suggests the  
371 speculation of direct regulation of spindle assembly by pole-localized CYCB1.

372

## 373 **DISCUSSION**

374

375 **CYCB1 interacts with CDKB1.** Previously (Atkins & Cross, 2018), we inferred  
376 that CYCB1 was the most likely activator of CDKB1 enzymatic activity, since  
377 CDKB1-associated histone H1 kinase activity was greatly reduced in  
378 immunoprecipitates from *cycb1-5* cells. Here, we confirm and extend this finding:  
379 CYCB1 binds CDKB1 but not CDKA1 in immunoprecipitates from doubly tagged

380 cells, and CYCB1-associated histone H1 kinase activity is absent in  
381 immunoprecipitates from *cdkb1-1* cells.

382

383 **Cell-cycle-regulated and APC-dependent CYCB1 proteolysis.** APC

384 inactivation greatly increased CDKB1-associated kinase activity, without altering  
385 CDKB1 levels (Atkins & Cross, 2018), and we inferred that this was likely due to  
386 blocking APC-dependent CYCB1 proteolysis. Here we show that CYCB1-GFP  
387 abundance is indeed sharply cell-cycle-regulated. For a brief period surrounding  
388 cell division, the estimated half-life of CYCB1-GFP is reduced to ~3-5 min., and  
389 degradation is absolutely dependent on functional APC. Turnover in each cell  
390 cycle cannot be detected in bulk culture (Fig. 1) because synchrony is  
391 insufficient. This is to be expected since the period of instability is unlikely to be  
392 longer than 10-20% of each division cycle, so even slight offsets in timing among  
393 cells will prevent detection of synchronous degradation. Notably, though,  
394 CYCB1-GFP degradation is sharply synchronous within daughter progeny in a  
395 single cell undergoing multiple fission. The basis for synchrony (whether due to  
396 identical timing in independent progeny cells, or communication between cells) is  
397 unknown.

398       Classic experiments in *Xenopus* embryos show that cyclin B is needed for  
399 mitotic entry, but its degradation is needed for mitotic exit (Murray et al., 1989;  
400 Murray & Kirschner, 1989). In budding yeast, the degradation of the B-type cyclin  
401 Clb2 is essential for viability (Wäsch & Cross, 2002), though this requirement can  
402 be bypassed by periodic inhibition of cyclin B-CDK-associated kinase (Thornton  
403 & Toczyski, 2003). The closely-related B-type cyclin Clb3, however, can persist  
404 undegraded without blocking mitotic exit, and without impacting viability (Pecani  
405 & Cross, 2016). In *N. tabacum*, expression of destruction-box-deleted *CYCB1*  
406 resulted in defective cytokinesis (Weingartner et al., 2004), perhaps due to  
407 inactivation of cytokinesis-inducing proteins by CDK phosphorylation (Sasabe &  
408 Machida, 2014). A requirement for cyclin B degradation for cytokinesis could  
409 account for an essential requirement for degradation. Independently, relicensing  
410 of replication origins is also blocked by high CDK activity in many systems

411 (Kearsey & Cotterill, 2003), providing a distinct reason why cyclin B degradation  
412 might be essential.

413 Inability to complement *cycb1-5* ts-lethality by transformation with *CYCB1-*  
414 *db-GFP* (with the conserved destruction box deleted) is consistent with CYCB1  
415 degradation being essential in *Chlamydomonas* as well. We speculated  
416 previously that CYCB1 might inhibit completion of cytokinesis, since elevating  
417 CYCB1 levels by *apc* inactivation is associated with absence of a cleavage  
418 furrow, while *apc cycb1-5* double mutants form an aberrant partial furrow similar  
419 to that produced by *cycb1-5* single mutants (Atkins & Cross, 2018).

420

421 **CDKB1 levels are regulated by entry into ‘division phase’ but not by cell**  
422 **cycle position.** *CDKB* transcription and protein accumulation is elevated in  
423 mitotic cells in *Cyanodioschizon*, *Ostreococcus*, *Physcomitrella*, and *Arabidopsis*  
424 (red and green algae, moss, and land plant) (Corellou et al., 2005; Nowack et al.,  
425 2012). This leads to the model that its degradation after mitosis could be cell-  
426 cycle-phase-specific, perhaps serving the same function as cyclin B degradation,  
427 to allow mitotic exit (Adachi et al., 2006; Corellou et al., 2005). Our results show  
428 that in *Chlamydomonas*, this is not so. Unlike cyclin B, CDKB1 (the sole CDKB  
429 family member) is not removed at the conclusion of each mitosis. Rather,  
430 CDKB1 is restricted to what we call ‘division phase’: a condition of commitment to  
431 cell divisions (whether one or many) (Cross, 2020; Heldt et al., 2020). Cells  
432 undergoing multiple divisions make CDKB1 before the first division, and it stays  
433 high until all divisions are complete (and cells exit ‘division phase’); it is then  
434 rapidly degraded. The distinction between mitosis-specific accumulation and  
435 division-phase-specific accumulation is more easily made in *Chlamydomonas* as  
436 a result of multiple fission biology.

437 We recently suggested an equivalence between classical ‘commitment’ to  
438 division, and activation of transcription of a large number of division-essential  
439 genes including *CDKB1* (Cross, 2020). We speculate that transcription of these  
440 genes may be continuous throughout the period of multiple fission; lack of any  
441 drop in CDKB1 protein levels between divisions is consistent with this idea. We



442 found recently that the replication control protein MCM4, a member of the mitotic  
443 transcriptional regulon along with CDKB1, accumulates as cells enter division  
444 phase, remains at a high level until the terminal division, then is degraded (Ikui et  
445 al., 2021), thus exhibiting similar behavior to CDKB1. This is consistent with the  
446 idea of ‘division phase’ as a discrete cellular state, permissive for cell cycle  
447 progression but independent of specific cell cycle phase (Cross, 2020; Heldt et  
448 al., 2020). CDKB1 lacks a recognizable target for APC-dependent degradation  
449 (D-box or KEN box) but nevertheless it is not degraded in a *cdc27-6* background  
450 (Figs. 1, 4). Thus, there must be a separate pathway between APC and CDKB1.  
451 The mitotic transcriptome continues to be expressed at a high level in this  
452 background (Tulin and Cross 2015; FC and KP, unpublished results); thus, the  
453 APC is required for exit from division phase, and CDKB1 may remain stably  
454 accumulated at a high level for this reason.

455

#### 456 **Regulation of microtubule dynamics and morphogenesis by CYCB1-CDKB1** 457 **and APC-CDC20.**

458

459 EB1-NG was shown to be an informative single-cell marker for mitotic  
460 progression in *Chlamydomonas* (Onishi et al., 2020). As cells entered mitosis  
461 EB1-NG localization undergoes dramatic changes (Onishi et al., 2020): the single  
462 polar focus of EB1-NG splits into two and separates; the mitotic spindle then  
463 forms between these two foci, and persists for ~4 min before anaphase.  
464 Specifically during this period, the cortical comets characteristic of interphase  
465 cells (Harris et al., 2016) are entirely suppressed (Fig. 11). After spindle  
466 breakdown, EB1-NG signal immediately moved to a line perpendicular to the  
467 former spindle axis, and marked the growing cleavage furrow. Cleavage in  
468 *Chlamydomonas* is strongly dependent on microtubules (Ehler & Dutcher, 1998),  
469 and can occur in the complete absence of F-actin (Onishi et al., 2020), so the  
470 furrow localization of EB1-NG likely reflects essential microtubule growth during  
471 cytokinesis.

472 CYCB1/CDKB1 is required for the first step in this process; arrested *cycb1*  
473 cells keep a single anterior focus which does not split (Fig. 8). Because no  
474 spindle forms in these cells, polar splitting in wild-type may produce poles  
475 required for spindle generation. The mutant cells form an initial cellular  
476 indentation (the ‘notch’; Tulin & Cross, 2014) (Fig. 8), at the position of the  
477 anterior EB1-NG focus, but no extension of a line of EB1-NG into the cell (as  
478 observed in full cytokinesis; Onishi et al., 2020; Fig. 7) is observed.

479 Localization of CYCB1 to the region of the spindle poles 1-2 min before  
480 spindle formation is consistent with a direct regulation of the microtubule-  
481 organizing activity of spindle poles. In animal cells and in yeast, cyclin B localizes  
482 to centrosomes via the cyclin B ‘hydrophobic patch’ docking motif (Basu et al.  
483 2020 and references therein); and *Chlamydomonas* CYCB1 retains all key  
484 residues making up the hydrophobic patch. In contrast to *Chlamydomonas*,  
485 though, this localization may occur long before actual spindle formation. It is also  
486 important to note that in *Chlamydomonas*, the spindle pole is spatially distinct  
487 from the basal body (centrosome equivalent) (O’Toole and Dutcher 2014). We do  
488 not know whether CYCB1 localization is specific to one or the other of basal  
489 bodies or spindle poles.

490 Inactivation of APC or CDC20 has no effect on EB1 polar splitting or  
491 spindle formation, but anaphase, cleavage and cytokinesis are completely  
492 blocked; consistently, no ‘line’ of EB1-NG signal perpendicular to the spindle axis  
493 is observed in these blocked cells (Figures 9 and 10).

494 These results imply strong and opposing effects on microtubule dynamics  
495 and morphogenesis by CYCB1/CDKB1 versus APC-CDC20. These events occur  
496 in stereotyped time intervals coordinated (and likely caused by) tight sequential  
497 changes in CYCB1 levels and APC-CDC20 activity.

498 Regulation of microtubule dynamics and spindle morphogenesis by cyclin  
499 B-CDK may be conserved throughout eukaryotes (Basu et al., 2020; Verde et al.,  
500 1992) – our results extend this conservation to the deeply diverged plant  
501 kingdom. Overall, we observe strong conservation between *Chlamydomonas* and  
502 yeast and animals of the roles of cyclin B/CDK and the APC with respect to their

503 inter-regulation and their overall effects on cell cycle biology including spindle  
504 morphogenesis. However, while cyclin B has a highly conserved role in mitosis,  
505 its associated kinase subunit is CDKB1 rather than CDK1/CDKA1 as in yeast  
506 and animals; this substitution may be universal within the Viridiplantae plant  
507 kingdom (Atkins & Cross, 2018; Corellou et al., 2005; Nowack et al., 2012; Tulin  
508 & Cross, 2014). In the plant kingdom, CDKA1 may instead be specific to cell size  
509 control and the G1/S transition (Cross, 2020). *Chlamydomonas* thus provides a  
510 unique opportunity to investigate the molecular regulation and mitotic functions of  
511 the plant-specific mitotic inducer CYCB/CDKB in a unicellular system, at high  
512 spatial and temporal resolution.

513

514

515

## 516 **Materials and Methods**

517

518 Immunoblotting, immunoprecipitation, and protein kinase assays were carried out  
519 as previously described (Atkins & Cross, 2018).

520

## 521 **Fluorescent reporter constructs**

522

523 **CYCB1-GFP:** We constructed a plasmid with 1.3 kb of genomic DNA upstream  
524 of *CYCB1*, followed by the *CYCB1* coding sequence with introns; the termination  
525 codon was replaced with 3 copies of a GlyGlyGlyGlySer linker sequence followed  
526 by GFP. After the GFP termination codon the plasmid contained 1.1 kb of the 3'  
527 UT region from *CDKB1*, followed by a 1 kb fragment containing a paromomycin  
528 resistance cassette.

529 We linearized this plasmid and transformed a *cycb1-5* strain by  
530 electroporation as described (Atkins & Cross, 2018). We recovered  
531 transformants in two ways: either by selection on paromomycin at 21 degrees  
532 (permissive temperature for *cycb1-5*) or by selection without paromomycin at 33  
533 degrees (non-permissive temperature). For unknown reasons, likely related to

534 the known fragmentation of transforming DNA in *Chlamydomonas*, all of the  
535 paromomycin-resistant colonies tested were temperature-sensitive, and none of  
536 the temperature-resistant colonies were paromomycin-resistant. We chose one  
537 temperature-resistant transformant and found linkage in tetrad analysis between  
538 a single locus containing *GFP* by PCR, and rescue of temperature-sensitivity of  
539 *cycb1-5*. Parallel transformations with an identical plasmid with a deletion of the  
540 *CYCB1* destruction box (Atkins and Cross, 2018) failed to yield any temperature-  
541 resistant transformants in multiple experiments.

542

543 *Chlamydomonas* transgenes are frequently subject to random silencing  
544 (Schroda, 2019). We largely eliminated this problem with *CYCB1-GFP* by  
545 selection of cultures at non-permissive temperature before time-lapse  
546 microscopy (see below). Even with this precaution, we observed sporadic cells in  
547 time-lapse that failed to express *CYCB1-GFP*, instead arresting with the  
548 characteristic morphology of *cycb1-5* (Atkins & Cross, 2018).

549 In one experiment in this paper (Fig. 12, Supp. Video 8) we used an allele  
550 of *CYCB1-GFP* in which the endogenous copy of *CYCB1* was tagged with GFP,  
551 by a method to be described elsewhere (MO and FC, unpublished). The  
552 endogenously tagged *CYCB1-GFP* behaved similarly to the *CYCB1-GFP*  
553 transgene used in all other experiments reported here.

554 **EB1:** To construct pMO699 (EB1-mSC), the mNeonGreen sequence in pCrEB1-  
555 NG (Harris et al., 2015) was excised out using *XhoI* sites and replaced with  
556 mScarlet-I [amplified from mScarlet-I-mTurquoise2 (Addgene, Plasmid #98839)  
557 (Mastop et al., 2017)] by Gibson assembly. pMO669 was then linearized using  
558 *EcoRI* and *Scal* prior to transformation into *Chlamydomonas* by electroporation.

559 In the experiment shown in Fig. 11, an endogenously tagged *EB1-*  
560 *NG* allele was employed, constructed by a method to be described elsewhere  
561 (MO and FC, unpublished). As with *CYCB1-GFP*, the endogenously tagged  
562 protein behaved similarly to transgene used in all other experiments reported  
563 here.

564

565

## 566 **Time-lapse Microscopy**

567

568 Multiple imaging methods were used. Method #1 was used for single Z-  
569 plane imaging at 3 min. intervals and low fluorescence exposure times to avoid  
570 cell phototoxicity and to image cells through multiple division cycles. Method #2  
571 was used for 10- or 20-second interval movies at a single Z-plane. Method #3  
572 was used for 1-minute interval movies with high fluorescence exposure times.  
573 These methods are complementary; frequent exposures, high exposure times  
574 and multiple Z planes allowed high-resolution detection of events within a single  
575 cell division, but the imaged cells generally lost viability soon after; while the  
576 much lower overall illumination of Method #1 reduced temporal and spatial  
577 resolution but allowed reliable imaging of an entire multiple fission cycle (at the  
578 end of which viable cells hatched from the mother and swam away).

579

580 **Method #1:** Cells were taken from a 2-day culture on a TAP plate, transferred to  
581 liquid TAP for 4 hrs. for cells to become motile, then swimming cells were  
582 separated from dividing and other non-motile cells and debris. This separation  
583 was achieved by pipetting 500  $\mu$ L of the liquid cell culture, removing the pipette  
584 tip from the pipette, then placing the pipette tip into another tip containing 500  $\mu$ L  
585 TAP + 2% Ficoll, such that the end of the pipette tip containing the cells was in  
586 contact with the Ficoll. A white LED (Evan Designs) was then placed on the wide  
587 end of the pipette tip pair. This complete apparatus was then put in a dark  
588 enclosure. With the LED being the only source of light inside the enclosure, cells  
589 swim away from the light, into the Ficoll, and collect on the end of the pipette tip.  
590 Once a sufficient number of motile cells had traversed the Ficoll and  
591 accumulated on the pipette tip, the pipette tip was removed, and the cells were  
592 pushed out by lightly pressing the wide end of the pipette tip. This 'swim-  
593 selected' population mostly consisted of small to medium motile cells (due to the

594 high density of the Ficoll), with very few large or dividing cells carried over by the  
595 flow of the smaller cells.

596 To immobilize the swim-selected cells for long-term time lapse  
597 microscopy, they were placed on agarose medium immediately after collection,  
598 similar to what was used by Di Talia et. al. (2007) for budding yeast microscopy.  
599 However, the setup employed by Di Talia et. al. (2007) involved large agarose  
600 slabs placed close together on a glass cover slip, and covered with a clear plastic  
601 piece, which was then sealed along the edges with paraffin. This setup could not  
602 be used for long-term microscopy of *Chlamydomonas* for the following reasons.  
603 First, unlike budding yeast, *Chlamydomonas* cells are motile, so placing agarose  
604 slabs close together on a cover slip allows for the possibility of cells swimming  
605 from one slab to the other (if a connective layer of liquid is formed between the  
606 slabs). Second, in order to make long-term movies (20 hrs.), drying of the  
607 agarose must be minimized. A large plastic cover placed over the agarose slabs  
608 allows for enough drying during the course of the movie that cells often drift  
609 completely out of the field. Drying causes cells to move along the z-axis as well,  
610 necessitating a very large autofocus range. A large plastic cover also collects  
611 water on its inner surface by condensation, which was significant at the  
612 temperature at which we intended to make movies (33.3°C).

613 To avoid these issues, we designed a small cylindrical chamber with one  
614 open side (inner diameter: 5mm; inner height: 3.5 mm; wall diameter: 1 mm). The  
615 chamber was fabricated from clear acrylic sheets using a laser cutter at  
616 Rockefeller University's Precision Instrumentation Technologies facility. The  
617 barrel portion of the chamber was made by cutting two concentric circles on a 3.5  
618 mm-thick acrylic sheet. The inner circle had a diameter 2 mm smaller than the  
619 outer circle, so that the sides of the barrel were 1 mm wide. A lid was made by  
620 cutting a clear 1 mm-thick acrylic sheet in a circle with a diameter equal to the  
621 outer diameter of the barrel. The lid was then attached to the barrel with acrylic  
622 cement (Scigrip).

623 Molten TAP with 1.5% SeaKem NuSieve GTG agarose (Lonza) was  
624 poured into the chamber to a level of 3 mm above the top and a glass slide was

625 placed 1.5 mm above the upper edge of the box, flattening the agarose. The  
626 agarose was allowed to solidify at room temperature for 10 min., then the glass  
627 slide was removed. Cells were pipetted (0.5  $\mu$ L) onto the agarose surface and  
628 kept at room temperature for 15 min. to allow the surface to dry. The agarose  
629 edges were trimmed so that the exposed agarose surface was flat throughout.  
630 The cell side of the box was placed onto a 24 x 50 mm glass cover slip  
631 (Fisherbrand) and the exposed agarose portion was sealed with VALAP (equal  
632 mass petroleum jelly, paraffin, lanolin). When multiple cell chambers were used,  
633 they were placed 1 cm apart (center-to-center). Plastic cover slips (Rinzle and  
634 ACLAR, both from Electron Microscopy Sciences) occasionally resulted in better  
635 cell viability and division number compared to glass (mostly 3 divisions compared  
636 to 2 divisions on glass), but this difference was irregular between batches. Glass  
637 cover slips from our current supplier (Fisher Scientific 'Fisherbrand' Cat. No. 12-  
638 545-F), have been consistently better than Rinzle or ACLAR plastic in  
639 maintaining cell viability and most cells divide 3-4 times. Glass has the additional  
640 benefits of lower autofluorescence compared to plastic, and less flexion, which  
641 results in less drift along the z-axis, making autofocusing easier.

642 Time lapse microscopy was carried out on a Leica DMI6000B inverted  
643 microscope, using a 63X objective, with the objective and stage heated to  
644 33.3°C. Images were acquired using custom software, as previously described  
645 for budding yeast microscopy (Charvin et al., 2008), but with modifications to  
646 improve autofocus for *Chlamydomonas*. We acquired brightfield images instead  
647 of phase contrast, because brightfield allowed for more reliable autofocusing.  
648 Fluorescence images were acquired using a Leica EL6000 mercury-arc lamp and  
649 a 30% neutral density filter. GFP images were acquired with 0.4 s exposure  
650 using a narrow-band eGFP filter set from Chroma (Cat. No. 49020) to minimize  
651 autofluorescence. Venus and mNeonGreen (NG) images were acquired with 0.3  
652 s exposure using an eYFP filter set from Chroma (Cat. No. 49003). For  
653 chloroplast background, we acquired images with 0.003 s exposure using a Cy5  
654 filter set from Chroma (Cat. No. 49006).



655 In *Chlamydomonas*, chloroplasts fluorescence is detectable at most  
656 wavelengths, and this seriously interferes with detection of the rather dim  
657 CYCB1-GFP signal. We developed a simple deconvolution procedure to subtract  
658 chloroplast background from GFP (see below).

659 To provide the cells with illumination for photosynthesis between frames,  
660 we placed white LEDs (Evan Designs) 10 mm above the cell chambers and 7  
661 mm away from the imaging axis, so that the irradiance at the location of the cells  
662 was  $150 \mu\text{mol photons m}^{-2} \text{ s}^{-1}$ . The LEDs were mounted on a 3D-printed plastic  
663 enclosure that covered the cell chamber. The transmitted light path from above  
664 was not impeded because a clear plastic ACLAR film (Electron Microscopy  
665 Sciences) was used as a top. This enclosure also helped maintain temperature  
666 stability of the cell chamber by partially insulating against ambient temperature  
667 fluctuations. The LEDs were connected to a computer-controlled on/off timer  
668 (PowerUSB). The LED lights were off for the duration of the transmitted  
669 light/fluorescence image acquisition, then on for most of the remaining time until  
670 the subsequent frame. Because of imperfect synchrony between the time lapse  
671 image acquisition schedule and the exterior LED light on/off timer, 10-20 sec.  
672 were added to the LED off time, allowing a minimum of 90 sec. of LED  
673 illumination between 3-min. frames.

674 Temperature stability and accuracy during the course of a time lapse  
675 movie was extremely important. We found that in the microscopy setup described  
676 above, wild-type cells are inviable at 34°C and above. Many temperature-  
677 sensitive mutants do not arrest tightly below 33°C. Therefore, our movies were  
678 done at 33.3°C ( $\pm 0.3^\circ\text{C}$ ). To measure the temperature exactly at the location of  
679 the cells, we embedded a 0.1 mm diameter thermocouple (PerfectPrime TL0201)  
680 in the agarose microscopy chamber. To maintain this small temperature range,  
681 we heated the objective (with an aluminum collar) and stage (with an aluminum  
682 insert) with Peltier modules run by Oven Industries 5C7-195 controllers. To  
683 minimize the effect of air currents above and below the stage, we covered  
684 openings below the stage with aluminum foil, and used a 3D-printed plastic

685 enclosure above the stage. The enclosure was printed at Rockefeller University's  
686 Precision Instrumentation Technologies facility.

687

688 **Method #2:** As described previously (Onishi et al., 2020).

689

690 **Method #3:** Cells were synchronized using the 12L:12D light cycle at 26°C. At  
691 ~11 h, the cells were collected by centrifugation and spotted on a small block of  
692 TAP + 1.5% low-melting-point agarose (Bio-Rad), which was then placed in a  
693 glass-bottomed 18-well chamber (Ibidi) and sealed with additional TAP + low-  
694 melting-point agarose. Imaging was done using a Leica Thunder inverted  
695 microscope equipped with an HC PL APO 63X/1.40 N.A. oil-immersion objective  
696 lens and an OkoLab incubator chamber that was maintained at 27°C. Signals  
697 were captured using following combinations of LED excitation and emission  
698 filters: 510 nm and 535/15 nm for CYCB1-GFP and EB1-NG; 550 nm and 595/40  
699 nm for EB1-mSc; 640 nm and 705/72 nm for chlorophyll autofluorescence (AF).  
700 Time-lapse images were captured at 2-min intervals with 0.6  $\mu\text{m}$  Z-spacing  
701 covering 9  $\mu\text{m}$ ; still images were captured with 0.21  $\mu\text{m}$  Z-spacing covering 10-15  
702  $\mu\text{m}$ . The acquired fluorescence images were processed through Thunder Large  
703 Volume Computational Clearing and Deconvolution (Leica). Background  
704 chloroplast signal was removed from GFP images essentially as described  
705 below. Maximum projections from 15 z-stacked images of CYCB1-GFP and EB1-  
706 mSC were used in Fig. 12 and Supp. Video 8. CYCB1-GFP maximum  
707 projections were grainy because the signal was close to background; this  
708 problem was reduced by a Gaussian blurring of the GFP stack before the  
709 maximum projection was calculated ( $0.5 * \text{image}(n-1) + \text{image}(n) + 0.5 * \text{image}(n)$  ).

710

711  
712 **Quantification of EB1-NG signals.** The “Peak” mask representing the polar  
713 dots, mitotic spindle, and furrow, was created from MAX-projected EB1-NG  
714 images by applying Gaussian blur filtering (1.5 pixels) and a Default thresholding  
715 filter in ImageJ. A mask representing the total cell body was generated from

716 MAX-projected AF images by applying Gaussian blur filtering (2 pixels) and a  
717 Triangle thresholding filter. Subtraction of the “Peak” region from this mask  
718 yielded a mask essentially covering the cytoplasm. Unlike the mid-section  
719 images shown in the figures, this MAX projection covers most of the cell body  
720 after binarization using an appropriate threshold, except that the thin cortical  
721 layer is not covered. Strong 2-pixel blur was applied to expand the signal so that  
722 the resulting mask covers the cortex. In interphase cells, EB1 signal under this  
723 cytoplasmic mask was mainly due to discrete ‘comets’ of EB1 traveling along the  
724 cortex to the cell posterior (Harris et al., 2016). Signals of EB1-NG were  
725 quantitated in each mask after uniform subtraction of background corresponding  
726 to intensities in non-cell areas.

727

## 728 **Deconvolution for Time Lapse Image Analysis**

729

730 Autofluorescence from chloroplasts accounted for a large majority of the  
731 total signal with CYCB1-GFP or CDKB1-Venus detection. We developed a  
732 simple computational deconvolution procedure that largely corrected this  
733 problem. The key observation is that due to the broad excitation and emission  
734 spectra of photosynthetic pigments, chloroplasts are detectable with filters  
735 specific for GFP, YFP or RFP; in contrast, GFP and YFP have no signal under  
736 RFP detection. The brightest RFP signal was invariably detected in the posterior  
737 region of the cell where chloroplasts are known to reside. Therefore, assuming  
738 that chloroplast pigments have the same ratio of GFP:RFP detection at all points  
739 in the cell, it is straightforward, given paired images for GFP and RFP detection,  
740 to determine this ratio from high-RFP pixels (presumably deriving purely from  
741 chloroplast), and then to deconvolve the GFP-specific signal throughout the  
742 image (Supp. Fig. 2). This deconvolution is carried out automatically using the  
743 same algorithm for every image. To account for possible variations in lamp  
744 intensity or exposure time through a movie, the deconvolution ratio is calculated  
745 separately for each image in the series. Suppose  $F$  is the average ratio of red to  
746 green signal in the pixels with the highest red signal (pure chloroplast). Consider

747 another pixel potentially containing both chloroplast and CYCB1-GFP signal. If  
748 CYC is the amount of CYCB1-GFP contributing to signal from that pixel, and the  
749 total green and red signals from that pixel are G and R respectively, then

750

751  $G = FR + k \cdot CYC$ , where k is a constant reflecting green emission from a  
752 given amount of CYCB1-GFP. Therefore, amount of CYCB1 in that pixel (in  
753 arbitrary units) is:

754

755  $CYC = (G - FR) / k$

756

757 Assuming similar lamp intensity and exposure through the movie, k is a constant  
758 that is buried in arbitrary units for CYCB1-GFP. Given the assumptions above,  
759 this results in a linear measure of CYCB1-GFP comparable across an image and  
760 between images in a series, with the contribution of chloroplast to green signal  
761 removed.

762

763 The same procedure works for YFP.

764

765 MATLAB code to carry out the deconvolution is available on request.

766

767 The authors responsible for distribution of materials integral to the findings  
768 presented in this article in accordance with the policy described in the  
769 Instructions for Authors ([https://academic.oup.com/plcell/pages/General-  
770 Instructions](https://academic.oup.com/plcell/pages/General-Instructions)) are: Fred Cross; Masayuki Onishi.

771

## 772 **Acknowledgments**

773 We thank Karl Lechtreck for sharing pEB1-NG and an anti-EB1 antibody. We  
774 also thank the Chlamydomonas Resource Center for providing essential strains  
775 and reagents. This work was supported by National Science Foundation Grant  
776 MCB 1818383 (to M.O. and John R. Pringle), by Duke University Department of  
777 Biology, and by PHS grant RO1GM078153 to FC.

778

779

780 **References**

781

782 Adachi, S., Uchimiya, H., & Umeda, M. (2006). Expression of B2-type cyclin-  
783 dependent kinase is controlled by protein degradation in *Arabidopsis thaliana*.  
784 *Plant and Cell Physiology*. <https://doi.org/10.1093/pcp/pcl034>

785

786 Akhmanova, A., & Steinmetz, M. O. (2008). Tracking the ends: A dynamic protein  
787 network controls the fate of microtubule tips. In *Nature Reviews Molecular Cell*  
788 *Biology*. <https://doi.org/10.1038/nrm2369>

789

790 Atkins, K. C., & Cross, F. R. (2018). Interregulation of CDKA/CDK1 and the plant-  
791 specific cyclin-dependent kinase CDKB in control of the *Chlamydomonas* cell  
792 cycle. *Plant Cell*. <https://doi.org/10.1105/tpc.17.00759>

793

794 Basu, S., Roberts, E. L., Jones, A. W., Swaffer, M. P., Snijders, A. P., & Nurse,  
795 P. (2020). The Hydrophobic Patch Directs Cyclin B to Centrosomes to Promote  
796 Global CDK Phosphorylation at Mitosis. *Current biology: CB*, 30(5), 883–892.e4.  
797 <https://doi.org/10.1016/j.cub.2019.12.053>

798

799 Boruc, J., van den Daele, H., Hollunder, J., Rombauts, S., Mylle, E., Hilson, P.,  
800 Inzé, D., de Veylder, L., & Russinova, E. (2010). Functional modules in the  
801 *Arabidopsis* core cell cycle binary protein-protein interaction network. *Plant Cell*.  
802 <https://doi.org/10.1105/tpc.109.073635>

803

804 Breker, M., Lieberman, K., & Cross, F. R. (2018). Comprehensive discovery of  
805 cell-cycle-essential pathways in *Chlamydomonas reinhardtii*. *Plant Cell*.  
806 <https://doi.org/10.1105/tpc.18.00071>

807

808 Charvin, G., Cross, F. R., & Siggia, E. D. (2008). A microfluidic device for  
809 temporally controlled gene expression and long-term fluorescent imaging in  
810 unperturbed dividing yeast cells. PLoS ONE.  
811 <https://doi.org/10.1371/journal.pone.0001468>  
812

813 Corellou, F., Camasses, A., Ligat, L., Peaucellier, G., & Bouget, F. Y. (2005).  
814 Atypical regulation of a green lineage-specific B-type cyclin-dependent kinase.  
815 Plant Physiology. <https://doi.org/10.1104/pp.105.059626>  
816

817 Cross, F. R. (2020). Regulation of Multiple Fission and Cell-Cycle-Dependent  
818 Gene Expression by CDKA1 and the Rb-E2F Pathway in Chlamydomonas.  
819 Current Biology. <https://doi.org/10.1016/j.cub.2020.03.019>  
820

821 Cross, F. R., & Umen, J. G. (2015). The Chlamydomonas cell cycle. Plant  
822 Journal. <https://doi.org/10.1111/tpj.12795>  
823

824 Di Talia, S., Skotheim, J. M., Bean, J. M., Siggia, E. D., & Cross, F. R. (2007).  
825 The effects of molecular noise and size control on variability in the budding yeast  
826 cell cycle. Nature, 448, 947–951. <https://doi.org/10.1038/nature06511>  
827

828 Ehler, L. L., Holmes, J. A., & Dutcher, S. K. (1995). Loss of spatial control of the  
829 mitotic spindle apparatus in a Chlamydomonas reinhardtii mutant strain lacking  
830 basal bodies. Genetics.  
831

832 Ehler, Linda L., & Dutcher, S. K. (1998). Pharmacological and genetic evidence  
833 for a role of rootlet and phycoplast microtubules in the positioning and assembly  
834 of cleavage furrows in Chlamydomonas reinhardtii. Cell Motility and the  
835 Cytoskeleton. [https://doi.org/10.1002/\(SICI\)1097-0169\(1998\)40:2<193::AID-  
836 CM8>3.0.CO;2-G](https://doi.org/10.1002/(SICI)1097-0169(1998)40:2<193::AID-CM8>3.0.CO;2-G)  
837

- 838 Glotzer, M., Murray, A. W., & Kirschner, M. W. (1991). Cyclin is degraded by the  
839 ubiquitin pathway. *Nature*, 349, 132–138. <https://doi.org/10.1038/349132a0>  
840
- 841 Harris, J. A., Liu, Y., Yang, P., Kner, P., & Lehtreck, K. F. (2016). Single-particle  
842 imaging reveals intraflagellar transport-independent transport and accumulation  
843 of EB1 in *Chlamydomonas* flagella. *Molecular Biology of the Cell*.  
844 <https://doi.org/10.1091/mbc.E15-08-0608>  
845
- 846 He, J., Chao, W. C. H., Zhang, Z., Yang, J., Cronin, N., & Barford, D. (2013).  
847 Insights into degron recognition by APC/C coactivators from the structure of an  
848 Acm1-Cdh1 complex. *Molecular Cell*.  
849 <https://doi.org/10.1016/j.molcel.2013.04.024>  
850
- 851 Heldt, F. S., Tyson, J. J., Cross, F. R., & Novák, B. (2020). A Single Light-  
852 Responsive Sizer Can Control Multiple-Fission Cycles in *Chlamydomonas*.  
853 *Current Biology*. <https://doi.org/10.1016/j.cub.2019.12.026>  
854
- 855 Ikui, A. E., Ueki, N., Pecani, K., & Cross, F. (2021). Control of pre-replicative  
856 complex during the division cycle in *Chlamydomonas reinhardtii*. *PLOS Genetics*.  
857 <https://doi.org/10.1371/journal.pgen.1009471>  
858
- 859 Janke, C., & Montagnac, G. (2017). Causes and Consequences of Microtubule  
860 Acetylation. In *Current Biology*. <https://doi.org/10.1016/j.cub.2017.10.044>  
861
- 862 Kearsey, S. E., & Cotterill, S. (2003). Enigmatic variations: Divergent modes of  
863 regulating eukaryotic DNA replication. In *Molecular Cell*.  
864 [https://doi.org/10.1016/S1097-2765\(03\)00441-6](https://doi.org/10.1016/S1097-2765(03)00441-6)  
865
- 866 Mastop, M., Bindels, D. S., Shaner, N. C., Postma, M., Gadella, T., Jr, &  
867 Goedhart, J. (2017). Characterization of a spectrally diverse set of fluorescent



868 proteins as FRET acceptors for mTurquoise2. *Scientific reports*, 7(1), 11999.  
869 <https://doi.org/10.1038/s41598-017-12212-x>  
870  
871 Morgan, D. O. (2007). *The Cell Cycle, Principles of Control*. Integrative and  
872 Comparative Biology. <https://doi.org/10.1093/icb/icm066>  
873  
874  
875 Murray, A. W., & Kirschner, M. W. (1989). Dominoes and clocks: the union of two  
876 views of the cell cycle. *Science (New York, N.Y.)*, 246, 614–621.  
877 <https://doi.org/10.1126/science.2683077>  
878  
879 Murray, A. W., Solomon, M. J., & Kirschner, M. W. (1989). The role of cyclin  
880 synthesis and degradation in the control of maturation promoting factor activity.  
881 *Nature*, 339, 280–286. <https://doi.org/10.1038/339280a0>  
882  
883 Nowack, M. K., Harashima, H., Dissmeyer, N., Zhao, X., Bouyer, D., Weimer, A.  
884 K., De Winter, F., Yang, F., & Schnittger, A. (2012). Genetic Framework of  
885 Cyclin-Dependent Kinase Function in Arabidopsis. *Developmental Cell*.  
886 <https://doi.org/10.1016/j.devcel.2012.02.015>  
887  
888 Onishi, M., Umen, J. G., Cross, F. R., & Pringle, J. R. (2020). Cleavage-furrow  
889 formation without F-actin in *Chlamydomonas*. *Proceedings of the National*  
890 *Academy of Sciences of the United States of America*.  
891 <https://doi.org/10.1073/pnas.1920337117>  
892  
893 O'Toole, E. T., & Dutcher, S. K. (2014). Site-specific basal body duplication in  
894 *Chlamydomonas*. *Cytoskeleton*, 71(2), 108–118.  
895 <https://doi.org/10.1002/cm.21155>  
896

897 Pecani, K., & Cross, F. R. (2016). Degradation of the mitotic cyclin clb3 is not  
898 required for mitotic exit but is necessary for G1 cyclin control of the succeeding  
899 cell cycle. *Genetics*. <https://doi.org/10.1534/genetics.116.194837>  
900

901 Rogozin, I. B., Basu, M. K., Csürös, M., & Koonin, E. V. (2009). Analysis of Rare  
902 Genomic Changes Does Not Support the Unikont–Bikont Phylogeny and  
903 Suggests Cyanobacterial Symbiosis as the Point of Primary Radiation of  
904 Eukaryotes. *Genome Biology and Evolution*. <https://doi.org/10.1093/gbe/evp011>  
905

906 Sasabe, M., & Machida, Y. (2014). Signaling pathway that controls plant  
907 cytokinesis. In *Enzymes*. <https://doi.org/10.1016/B978-0-12-801922-1.00006-3>  
908

909 Schroda, M. (2019). Good News for Nuclear Transgene Expression in  
910 *Chlamydomonas*. *Cells*. <https://doi.org/10.3390/cells8121534>  
911

912 Thornton, B. R., & Toczyski, D. P. (2003). Securin and B-cyclin/CDK are the only  
913 essential targets of the APC. *Nature Cell Biology*.  
914 <https://doi.org/10.1038/ncb1066>  
915

916 Tulin, F., & Cross, F. R. (2014). A microbial avenue to cell cycle control in the  
917 plant superkingdom. *Plant Cell*. <https://doi.org/10.1105/tpc.114.129312>  
918

919 Van Leene, J., Hollunder, J., Eeckhout, D., Persiau, G., Van De Slijke, E., Stals,  
920 H., Van Isterdael, G., Verkest, A., Neiryneck, S., Buffel, Y., De Bodt, S., Maere, S.,  
921 Laukens, K., Pharazyn, A., Ferreira, P. C. G., Eloy, N., Renne, C., Meyer, C.,  
922

923 Faure, J. D., ... De Jaeger, G. (2010). Targeted interactomics reveals a complex  
924 core cell cycle machinery in *Arabidopsis thaliana*. *Molecular Systems Biology*.  
925 <https://doi.org/10.1038/msb.2010.53>  
926

- 927 Verde, F., Dogterom, M., Stelzer, E., Karsenti, E., & Leibler, S. (1992). Control of  
928 microtubule dynamics and length by cyclin A- and cyclin B-dependent kinases in  
929 *Xenopus* egg extracts. *The Journal of cell biology*, 118(5), 1097–1108.  
930 <https://doi.org/10.1083/jcb.118.5.1097>  
931
- 932 Wäsch, R., & Cross, F. R. (2002). APC-dependent proteolysis of the mitotic  
933 cyclin Clb2 is essential for mitotic exit. *Nature*, 418, 556–562.  
934 <https://doi.org/10.1038/nature00856>
- 935 Weingartner, M., Criqui, M. C., Mészáros, T., Binarova, P., Schmit, A. C., Helfer,  
936 A., Derevier, A., Erhardt, M., Bögre, L., & Genschik, P. (2004). Expression of a  
937 nondegradable cyclin B1 affects plant development and leads to endomitosis by  
938 inhibiting the formation of a phragmoplast. *Plant Cell*.  
939 <https://doi.org/10.1105/tpc.020057>  
940
- 941 Zachariae, W., & Nasmyth, K. (1999). Whose end is destruction: Cell division and  
942 the anaphase-promoting complex. In *Genes and Development* (Vol. 13, pp.  
943 2039–2058). <https://doi.org/10.1101/gad.13.16.2039>  
944
- 945 Zhang, S., Chang, L., Alfieri, C., Zhang, Z., Yang, J., Maslen, S., Skehel, M., &  
946 Barford, D. (2016). Molecular mechanism of APC/C activation by mitotic  
947 phosphorylation. *Nature*. <https://doi.org/10.1038/nature17973>  
948

949 **FIGURE LEGENDS**

950

951 **Figure 1. Detection of CYCB1-GFP in wt, *cdc27-6*, or *cdkb1-1* backgrounds**  
952 **by immunoblotting**

953

954 Anti-GFP immunoblotting of cells with temperature-sensitive mutations *cdc27-6*  
955 or *cdkb1-1*. Cells were placed at restrictive temperature and collected after the  
956 indicated number of hours. All strains had temperature-sensitive *cycb1-5* rescued  
957 by CYCB1-GFP transgene.

958

959

960 **Figure 2. Detection of CYCB1-GFP binding partners and kinase activity by**  
961 **co-immunoprecipitation**

962

963 A: Anti-GFP immunoblotting of CYCB1-GFP pull-down in untagged control ('wt'),  
964 wt, *cdkb1-1*, or *cdc27-6* backgrounds (top row). Kinase activity co-  
965 immunoprecipitated with CYCB1-GFP in untagged, wt, *cdkb1-1*, or *cdc27-6*  
966 backgrounds (bottom row). All strains except for untagged wt control on left had  
967 temperature-sensitive *cycb1-5* rescued by CYCB1-GFP transgene.

968

969 B: Detection of CDKA1-mCherry or CDKB1-mCherry as possible binding  
970 partners of CYCB1-GFP. Strains with CYCB1-GFP and CDKA1-mCherry or  
971 CDKB1-mCherry (and wt, CDKA1-mCherry or CDKB1-mCherry alone) were  
972 immunoprecipitated with anti-GFP. Immunoblotting was then done with anti-GFP  
973 or anti-mCherry.

974

975

976 **Figure 3. Live cell time lapse microscopy of CYCB1-GFP**

977

978 (A) Time lapse images of CYCB1-GFP cells. Each cell has a brightfield image  
979 (right), and a composite of chloroplast autofluorescence in blue and CYCB1-GFP

980 signal in yellow (left). Time indicated on top of each strip is hours and minutes  
981 after beginning of time lapse. The indicated time corresponds to the top cell in  
982 each strip. Each subsequent cell going down is from an image captured every 3  
983 minutes (time from plating indicated). Arrows indicate new cleavage furrow  
984 formation detected in brightfield. The imaged cell went through three divisions;  
985 frames surrounding the first and last divisions are shown. Scale bar: 5 microns.  
986

987 (B) left: quantification of CYCB1-GFP signal deconvolved from chloroplast  
988 autofluorescence (yellow line), and chloroplast autofluorescence (blue line).  
989 Arrows: correspond to cleavage furrow formation. Right: Yellow trace: CYCB1-  
990 GFP total signal over the cell. Black: a minimal convex hull was computed that  
991 contained 50% of the CYCB1-GFP signal, and the concentration (signal/area)  
992 computed, showing that local concentration and total cellular amount of CYCB1-  
993 GFP tracked closely through divisions. MATLAB code for calculating the convex  
994 hull available on request.

995

996

997 **Figure 4. Live cell time lapse of CYCB1-GFP in a *cdc27-6* background**

998

999 (A) Each cell has a brightfield image (right), and a composite of chloroplast  
1000 autofluorescence in blue and CYCB1-GFP signal in yellow (left). Time indicated  
1001 on top of each strip is hours and minutes after beginning of time lapse. The  
1002 indicated time corresponds to the top cell in each strip. Each subsequent cell  
1003 going down is from an image captured every 3 minutes. Scale bar: 5 microns.

1004

1005 (B) Green: deconvolved total GFP signal in cell shown in A; blue: concentration  
1006 estimated as in Fig. 3.

1007

1008 (C) The same plots for the average and s.e.m. of 12 cells. All traces adjusted to a  
1009 maximum signal of 1 before averaging.

1010

1011

1012 **Figure 5. Live cell time lapse of CDKB1-Venus cells**

1013

1014 (A) Brightfield image (right), and a composite of chloroplast autofluorescence in  
1015 blue and CDKB1-Venus signal in yellow (left). Time indicated on top of each strip  
1016 is hours and minutes after beginning of time lapse. The indicated time  
1017 corresponds to the top cell in each strip. Each subsequent cell going down is  
1018 from an image captured every 3 minutes. Arrows: cleavage furrow formation.  
1019 Scale bar: 5 microns.

1020

1021 (B) Quantification of YFP signal in the cell shown in (A). Green line: total YFP  
1022 signal; blue line: estimated concentration (YFP signal per area) in the minimal  
1023 convex hull calculated to contain 50% of total signal.

1024

1025 (C) The same plots for the average and s.e.m. of 12 cells. All traces adjusted to a  
1026 maximum signal of 1 before averaging. In B and C, note reproducible peak of  
1027 concentration of CDKB1-GFP 1-2 frames before cleavage furrow formation. This  
1028 pattern repeated in successive cycles; the peak was reduced in intensity in the  
1029 averaged data, most likely due to slight asynchrony in timing comparing different  
1030 cells.

1031

1032

1033 **Figure 6. Live cell time lapse of wild-type EB1-NG cells with 10-sec.**

1034 **intervals**

1035

1036 Live cell time lapse with 10-sec. intervals acquired with microscopy method 2  
1037 (see Methods section). EB1-NG signal in orange. PS: pole separation. Sp:  
1038 spindle formation. SpB: spindle breakdown.

1039

1040

1041 **Figure 7. Live cell time lapse of wild-type EB1-NG cells with 3-min. intervals**

1042

1043 Live cell time lapse with 3-min. intervals acquired with microscopy method 1 (see  
1044 Methods section). Each cell has a brightfield image (right), and a composite of  
1045 EB1-NG signal in yellow and chloroplast autofluorescence signal in blue (left).  
1046 Yellow arrow: spindle pole separation. Blue arrows: new spindle formation. White  
1047 arrows: new cleavage furrow formation. Time indicated on top of each strip is  
1048 hours and minutes after beginning of time lapse. The indicated time corresponds  
1049 to the top cell in each strip. Each subsequent cell going down is from an image  
1050 captured every 3 minutes.

1051

1052

1053 **Figure 8. Live cell time lapse of *cycb1-5* EB1-NG cells**

1054

1055 Live cell time lapse acquired with microscopy method 1 (see Methods section).  
1056 Each cell has a brightfield image (right), and a composite of EB1-NG signal in  
1057 yellow and chloroplast autofluorescence signal in blue (left). Time indicated on  
1058 top of each strip is hours after beginning of time lapse. The indicated time  
1059 corresponds to the top cell in each strip. Each subsequent cell going down is  
1060 from an image captured every 30 minutes.

1061

1062

1063 **Figure 9. Live cell time lapse of *cdc27-6* EB1-NG cells**

1064

1065 Live cell time lapse acquired with microscopy method 1 (see Methods section).  
1066 Each cell has a brightfield image (right), and a composite of EB1-NG signal in  
1067 yellow and chloroplast autofluorescence signal in blue (left). Yellow arrows:  
1068 spindle pole separation. Blue arrows: new spindle formation. Time indicated on  
1069 top of each strip is hours and minutes after beginning of time lapse. The  
1070 indicated time corresponds to the top cell in each strip. Each subsequent cell  
1071 going down is from an image captured every 3 minutes.

1072



1073

1074 **Figure 10. Live cell time lapse of *cdc20-1* EB1-NG cells**

1075

1076 Live cell time lapse acquired with microscopy method 1 (see Methods section).  
1077 Each cell has a brightfield image (right), and a composite of EB1-NG signal in  
1078 yellow and chloroplast autofluorescence signal in blue (left). Time indicated on  
1079 top of each strip is hours and minutes after beginning of time lapse. The  
1080 indicated time corresponds to the top cell in each strip. Each subsequent cell  
1081 going down is from an image captured every 3 minutes.

1082

1083

1084 **Figure 11. Suppression of cytoplasmic EB1-NG comets during mitosis.**

1085

1086 (A, B) Representative examples of WT (A) and *cdc20-1* (B) cells expressing EB1-  
1087 NG. Time-lapse microscopy was done using Method 3 (see Materials and  
1088 Methods). Bar, 5  $\mu\text{m}$ . (C, D) Regions representing polar dot, spindle, and furrow  
1089 (green in A, B) and cytoplasm (magenta in A, B) were masked as described in  
1090 Materials and Methods. Total signals in the masked regions are presented as  
1091 mean  $\pm$  SEM (N = 7), with values from individual cells overlaid as dots. Time  
1092 zero (first appearance of complete spindle) was determined empirically for each  
1093 cell. See Supp. Figure 3 for individual traces.

1094

1095

1096 **Figure 12. Live cell time lapse of CYCB1-GFP EB1-mScarlet cells with 1-min  
1097 intervals**

1098

1099 Live cell time lapse imaging was done using Method 3 (see Methods section).  
1100 Imaging was done at 27°C. Select time-frames are shown with the times  
1101 indicated on the left (min.). For DIC and AF (chlorophyll autofluorescence), mid-  
1102 section images are shown; for EB1-mSc, maximum projections of Z-stacks are  
1103 shown; for CYCB1-GFP, maximum projections of Z-stacks after Gaussian

1104 blurring along the Z-axis are shown. Bar, 5 microns. See Supp. Video 8 for a  
1105 larger field of view including this cell through the entire time-series. In this  
1106 experiment, we used an allele of *CYCB1-GFP* in which the endogenous *CYCB1*  
1107 locus was tagged with GFP, by a method to be published elsewhere (MO and  
1108 FC, unpublished); results with the endogenously tagged *CYCB1* were in general  
1109 very comparable to results with the transgene used elsewhere in the paper.

1110

1111

1112

1113 **Supp. Figure 1. Live cell time lapse of *CYCB1-GFP* in a *cdkb1-1* background**

1114

1115 Live cell time lapse acquired with microscopy method 1 (see Methods section).  
1116 Each cell has a brightfield image (right), and a composite of EB1-NG signal in  
1117 yellow and chloroplast autofluorescence signal in blue (left). Time indicated on  
1118 top of each strip is hours and minutes after beginning of time lapse. The  
1119 indicated time corresponds to the top cell in each strip. Each subsequent cell  
1120 going down is from an image captured every 3 minutes.

1121

1122

1123 **Supp. Figure 2. Illustration of subtraction of chloroplast autofluorescence**  
1124 **in microscopy images**

1125

1126 Autofluorescence subtraction method demonstrated using single *CYCB1-GFP*  
1127 cell. First column: RFP detection (colored blue) (chloroplast signal only). Second  
1128 column: GFP detection channel only (*CYCB1-GFP* signal + chloroplast signal).  
1129 Third column: composite of first two columns. Fourth column: GFP signal  
1130 remaining after deconvolution (removal of contribution of chloroplast signal to  
1131 GFP channel, leaving *CYCB1-GFP* signal only). Fifth column: composite of RFP  
1132 channel (chloroplast only) and deconvoluted green channel (*CYCB1-GFP* signal  
1133 only). Bottom: quantification of total RFP and GFP signals (left), and GFP signal  
1134 concentration (blue line) before and after deconvolution.

1135

1136 **Supp. Figure 3. Traces for individual cells used for quantification in Figure**  
1137 **11.**

1138

1139 Top and bottom rows show the total signal under the green and magenta masks  
1140 in Figure 11, respectively.

1141

1142

1143 **Supp Video 1. CYCB1-GFP through 3 divisions.** Top left: blue line: RFP  
1144 (chloroplast) signal. Yellow line: deconvolved CYCB-GFP signal. Top 2<sup>nd</sup> graph:  
1145 yellow: total GFP signal; black: a minimal convex hull was calculated containing  
1146 50% of the total cell GFP signal and concentration calculated; 3<sup>rd</sup>: histogram of  
1147 intensities in the convex hull; 4<sup>th</sup>: surface plot of GFP intensity. Below: brightfield  
1148 (left) and fluorescence (right). Black line: manually selected cell outline. White  
1149 line: computed convex hull.

1150

1151 **Supp Video 2. CYCB1-GFP in *cdkb1-1* background.** Graphs and images as in  
1152 Supp. Video 1.

1153

1154 **Supp. Video 3. Live cell time lapse of wild-type EB1-NG cells with 10-sec.**  
1155 **intervals**

1156

1157 Live cell time lapse with 10-sec. intervals acquired with microscopy method 2  
1158 (see Methods section). EB1-NG signal in blue.

1159

1160

1161 **Supp. Video 4. Live cell time lapse of wild-type EB1-NG cells carrying out 3**  
1162 **rounds of multiple fission, 3-min. intervals**

1163

1164 Live cell time lapse with 3-min. intervals acquired with microscopy method 1 (see  
1165 Methods section). Image on left is brightfield, image on right is EB1-NG signal in  
1166 yellow and chloroplast autofluorescence signal in blue.

1167

1168

1169 **Supp. Video 5. Live cell time lapse of *cycb1-5* EB1-NG cells**

1170

1171 Live cell time lapse acquired with microscopy method 1 (see Methods section), 3  
1172 min intervals. Image on left is brightfield, image on right is EB1-NG signal in  
1173 yellow and chloroplast autofluorescence signal in blue.

1174

1175

1176

1177 **Supp. Video 6. Live cell time lapse of *cdc27-6* EB1-NG cells**

1178

1179 Live cell time lapse acquired with microscopy method 1 (see Methods section) , 3  
1180 min intervals. Image on left is brightfield, image on right is EB1-NG signal in  
1181 yellow and chloroplast autofluorescence signal in blue.

1182

1183

1184 **Supp. Video 7. Live cell time lapse of *cdc20-1* EB1-NG cells**

1185

1186 Live cell time lapse acquired with microscopy method 1 (see Methods section) , 3  
1187 min intervals. Image on left is brightfield, image on right is EB1-NG signal in  
1188 yellow and chloroplast autofluorescence signal in blue.

1189

1190

1191 **Supp. Video 8. Time lapse microscopy of CYCB1-GFP EB1-mScarlet cells**

1192

1193 Live cell time lapse of CYCB1-GFP EB1-mScarlet cells with 1-min. intervals  
1194 acquired with microscopy method 3, with 15 z-stacks (see Methods section). Left

1195 to right: DIC (time in min:sec indicated); EB1-mSC; CYCB1-GFP; chloroplast  
1196 autofluorescence; overlap of CYCB1-GFP (green) and EB1-mSC (magenta).  
1197 GFP images were deconvolved to remove chloroplast contribution (Methods).  
1198 The GFP z images were filtered ( $0.5 * \text{image}(n-1) + \text{image}(n) + 0.5 * (n-2)$ ) and  
1199 then a maximum projection calculated. This procedure was developed for  
1200 maximum detail while minimizing graininess. EB1-mSC images are a maximum  
1201 projection. Control experiments using EB1-mSC cells lacking GFP show no  
1202 bleedthrough from mSC to the GFP channel (data not shown).

1203

1204

1205

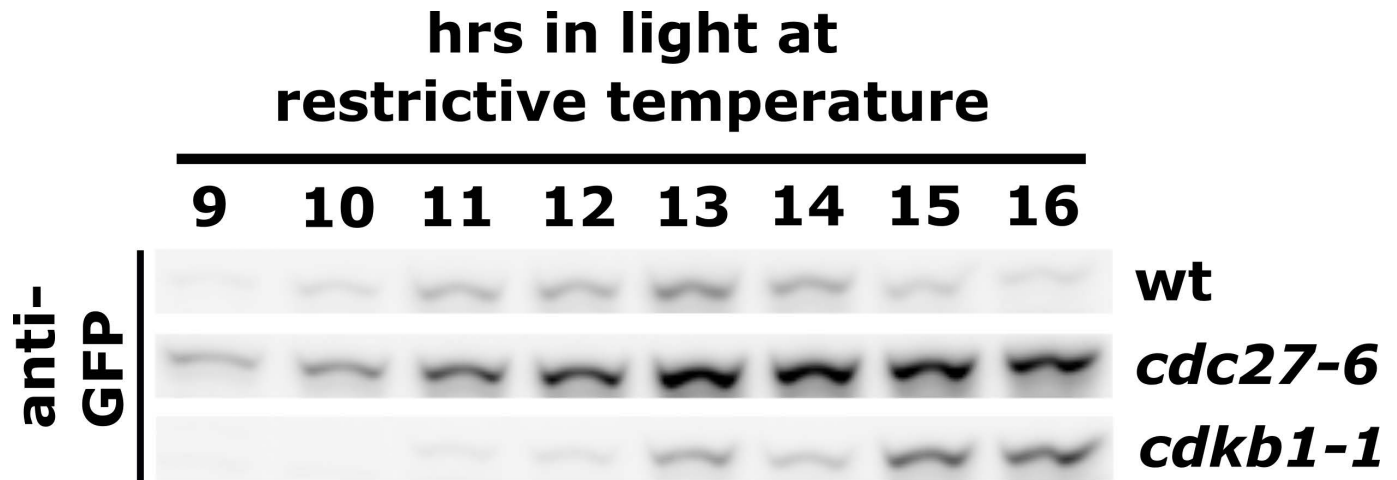

Figure 1. Detection of CYCB1-GFP in wt, *cdc27-6*, or *cdkb1-1* backgrounds by immunoblotting

Anti-GFP immunoblotting of cells with temperature-sensitive mutations *cdc27-6* or *cdkb1-1*. Cells were placed at restrictive temperature and collected after the indicated number of hours. All strains had temperature-sensitive *cycb1-5* rescued by CYCB1-GFP transgene.

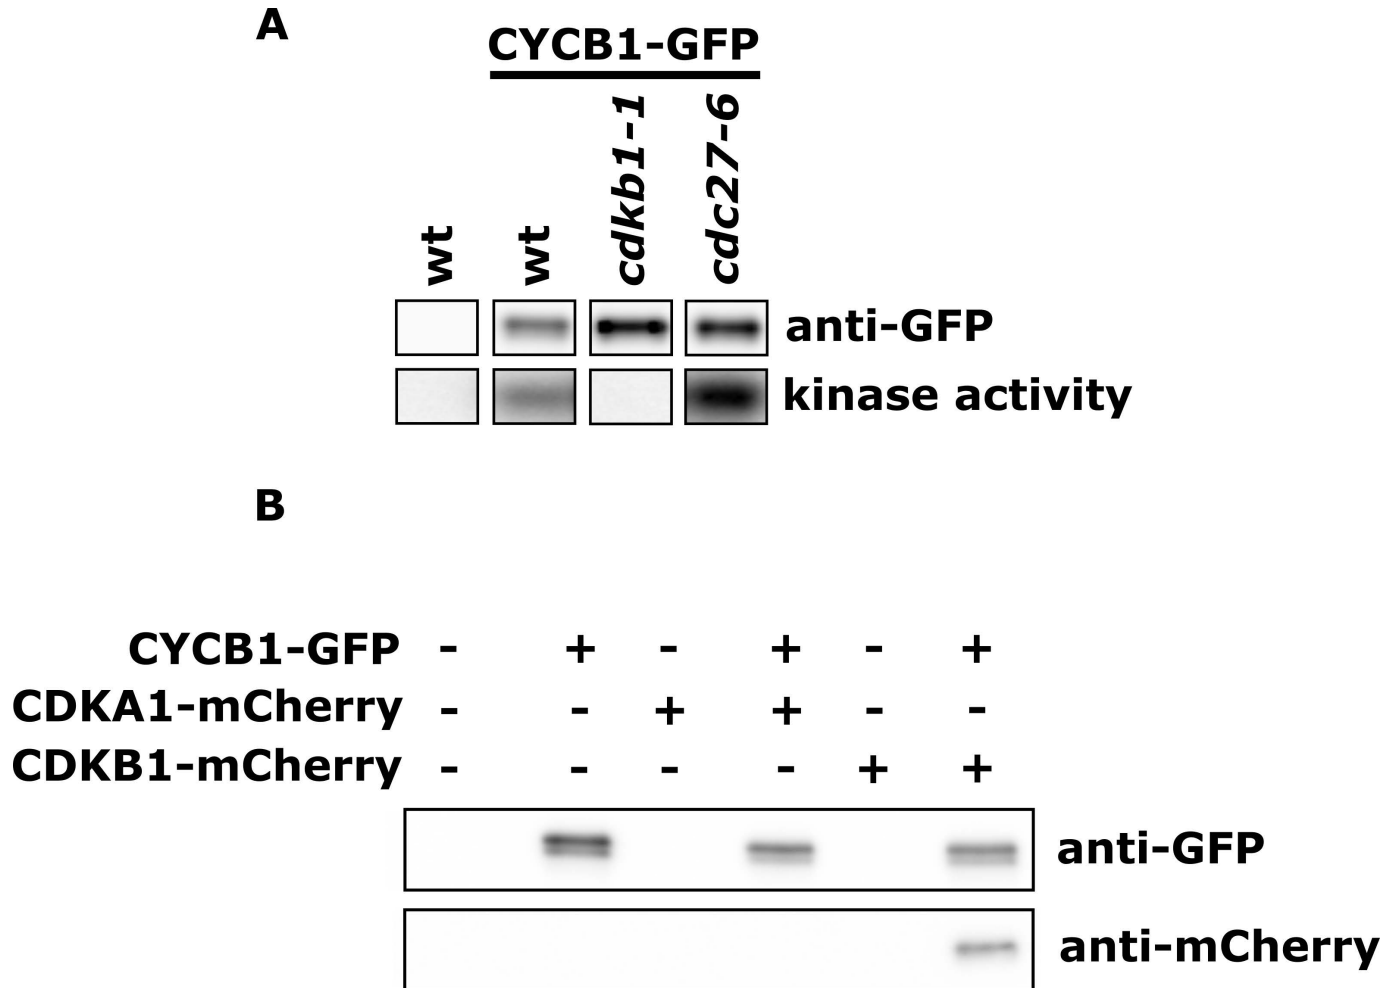

Figure 2. Detection of CYCB1-GFP binding partners and kinase activity by co-immunoprecipitation

A: Anti-GFP immunoblotting of CYCB1-GFP pull-down in untagged control ('wt'), wt, *cdkb1-1*, or *cdc27-6* backgrounds (top row). Kinase activity co-immunoprecipitated with CYCB1-GFP in untagged, wt, *cdkb1-1*, or *cdc27-6* backgrounds (bottom row). All strains except for untagged wt control on left had temperature-sensitive *cycb1-5* rescued by CYCB1-GFP transgene.

B: Detection of CDKA1-mCherry or CDKB1-mCherry as possible binding partners of CYCB1-GFP. Strains with CYCB1-GFP and CDKA1-mCherry or CDKB1-mCherry (and wt, CDKA1-mCherry or CDKB1-mCherry alone) were immunoprecipitated with anti-GFP. Immunoblotting was then done with anti-GFP or anti-mCherry.



**A**

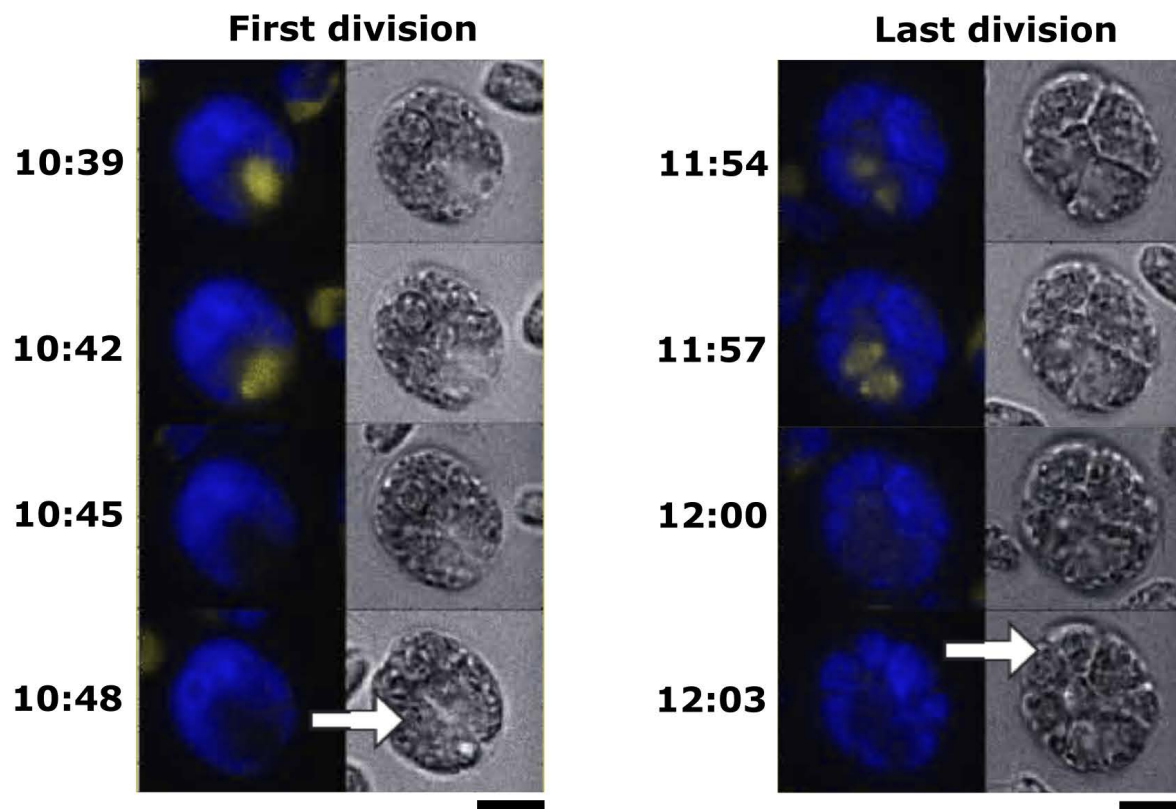

**B**

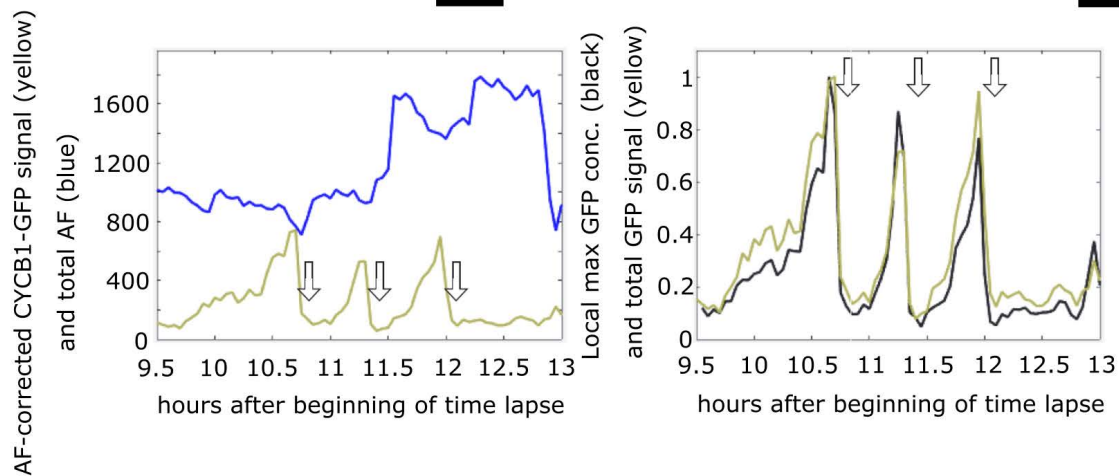

Figure 3. Live cell time lapse microscopy of CYCB1-GFP

(A) Time lapse images of CYCB1-GFP cells. Each cell has a brightfield image (right), and a composite of chloroplast autofluorescence in blue and CYCB1-GFP signal in yellow (left). Time indicated on top of each strip is hours and minutes after beginning of time lapse. The indicated time corresponds to the top cell in each strip. Each subsequent cell going down is from an image captured every 3 minutes (time from plating indicated). Arrows indicate new cleavage furrow formation detected in brightfield. The imaged cell went through three divisions; frames surrounding the first and last divisions are shown. Scale bar: 5 microns.

(B) left: quantification of CYCB1-GFP signal deconvolved from chloroplast autofluorescence (yellow line), and chloroplast autofluorescence (blue line). Arrows: correspond to cleavage furrow formation. Right: Yellow trace: CYCB1-GFP total signal over the cell. Black: a minimal convex hull was computed that contained 50% of the CYCB1-GFP signal, and the concentration (signal/area) computed, showing that local concentration and total cellular amount of CYCB1-GFP tracked closely through divisions. MATLAB code for calculating the convex hull available on request.

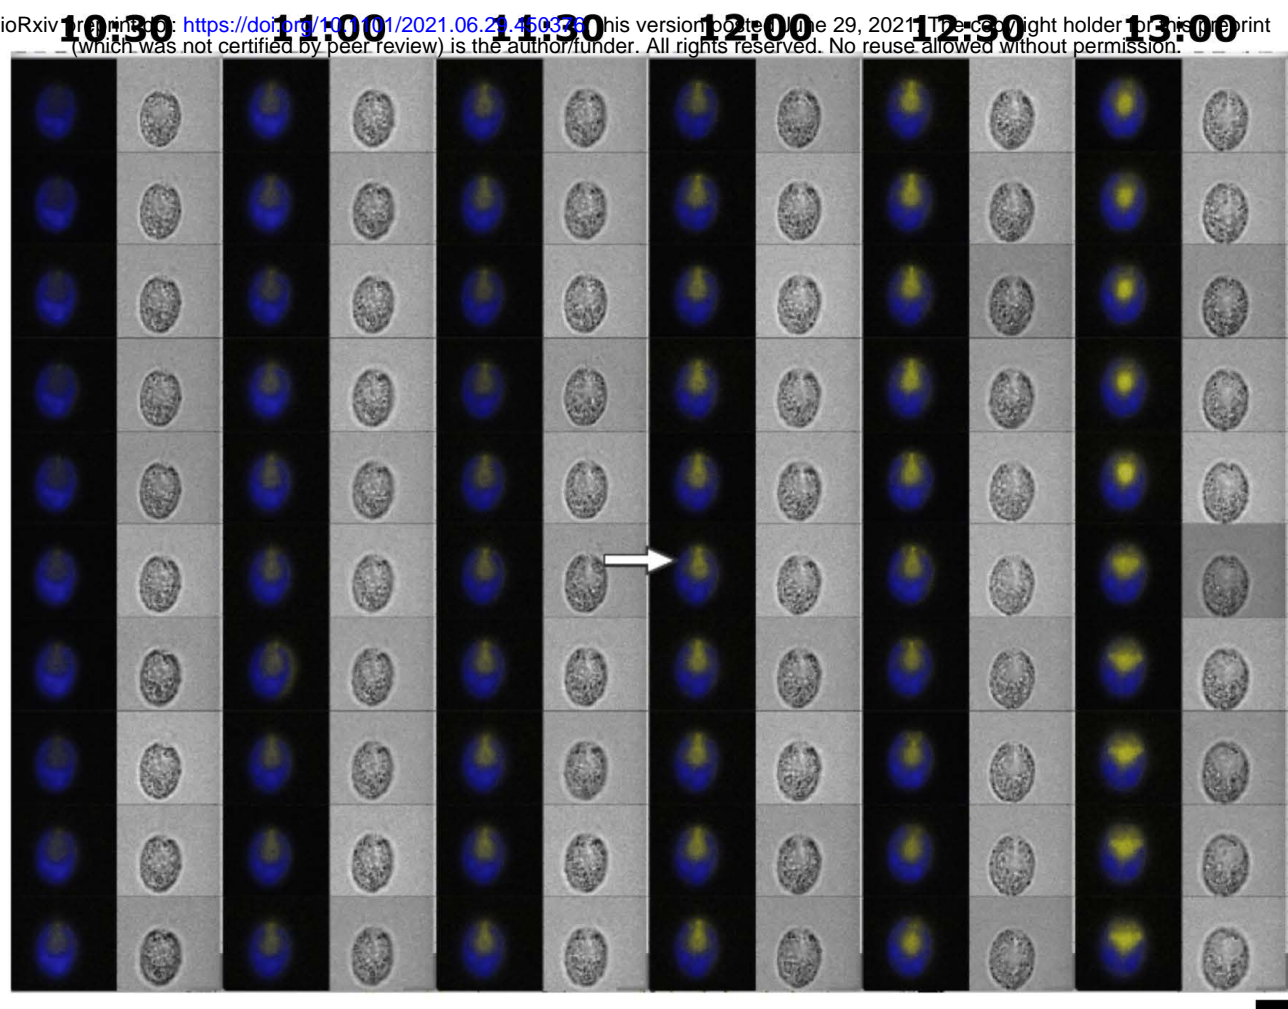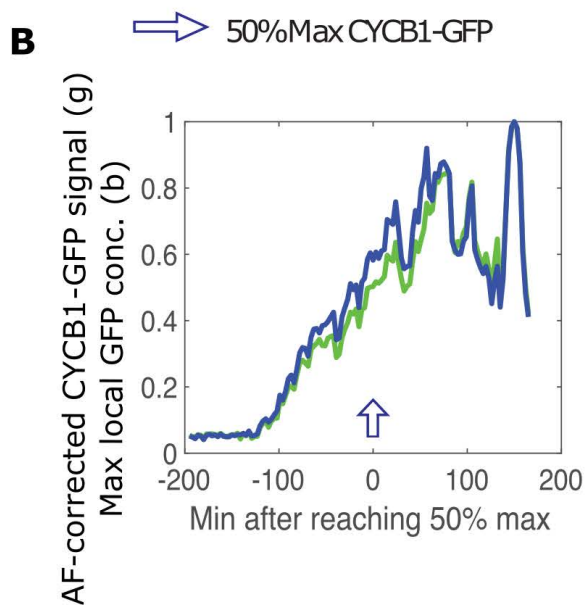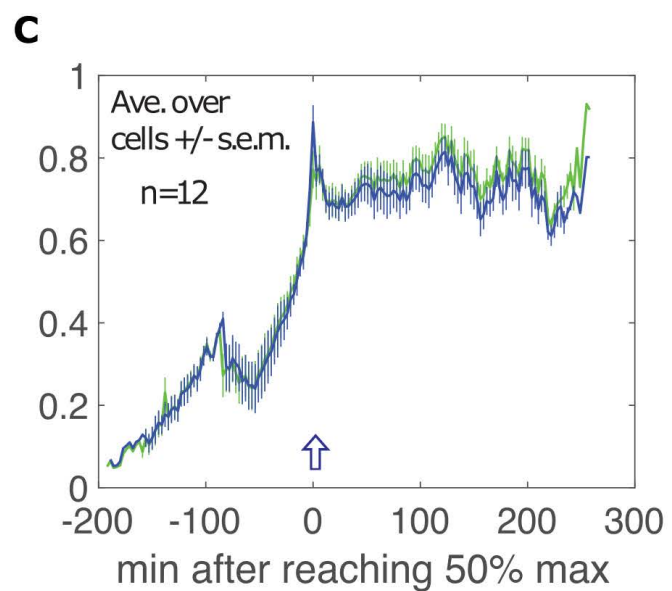

Figure 4. Live cell time lapse of CYCB1-GFP in a *cdc27-6* background

(A) Each cell has a brightfield image (right), and a composite of chloroplast autofluorescence in blue and CYCB1-GFP signal in yellow (left). Time indicated on top of each strip is hours and minutes after beginning of time lapse. The indicated time corresponds to the top cell in each strip. Each subsequent cell going down is from an image captured every 3 minutes. Scale bar: 5 microns.

(B) Green: deconvolved total GFP signal in cell shown in A; blue: concentration estimated as in Fig. 3.

(C) The same plots for the average and s.e.m. of 12 cells. All traces adjusted to a maximum signal of 1 before averaging.



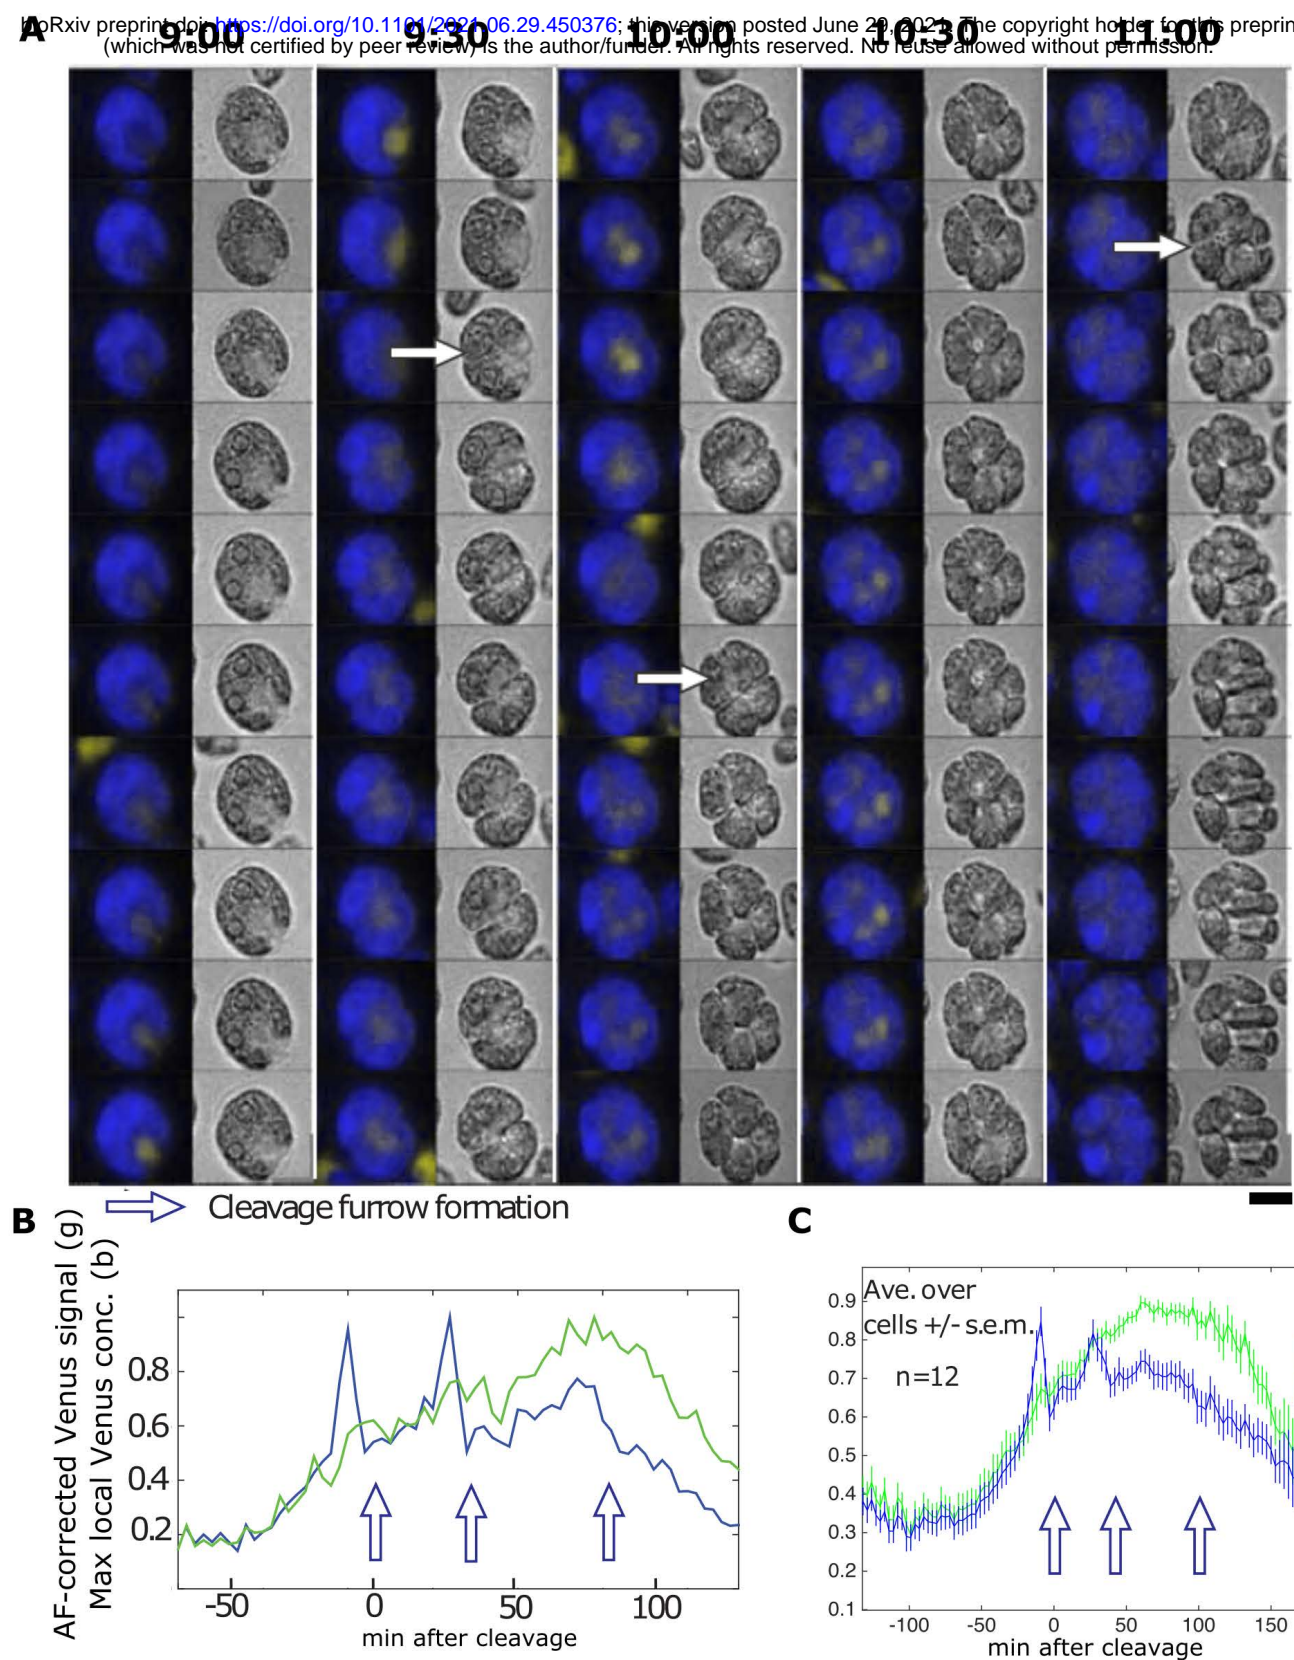

Figure 5. Live cell time lapse of CDKB1-Venus cells

(A) Brightfield image (right), and a composite of chloroplast autofluorescence in blue and CDKB1-Venus signal in yellow (left). Time indicated on top of each strip is hours and minutes after beginning of time lapse. The indicated time corresponds to the top cell in each strip. Each subsequent cell going down is from an image captured every 3 minutes. Arrows: cleavage furrow formation. Scale bar: 5 microns.

(B) Green line: total YFP signal; blue line: estimated concentration (YFP signal per area) in the minimal convex hull calculated to contain 50% of total signal.

(C) The same plots for the average and s.e.m. of 12 cells. All traces adjusted to a maximum signal of 1 before averaging. In B and C, note reproducible peak of concentration of CDKB1-GFP 1-2 frames before cleavage furrow formation.

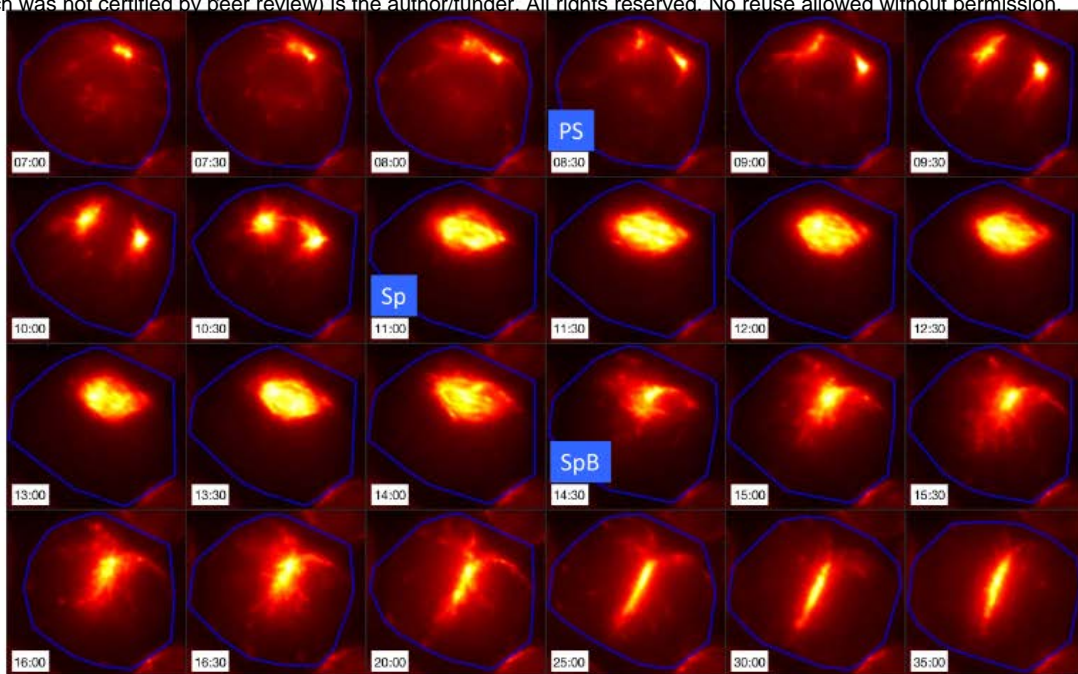

Figure 6. Live cell time lapse of wild-type EB1-NG cells with 10-sec. intervals

Live cell time lapse with 10-sec. intervals acquired with microscopy method 2 (see Methods section). EB1-NG signal in orange. PS: pole separation. Sp: spindle formation. SpB: spindle breakdown.

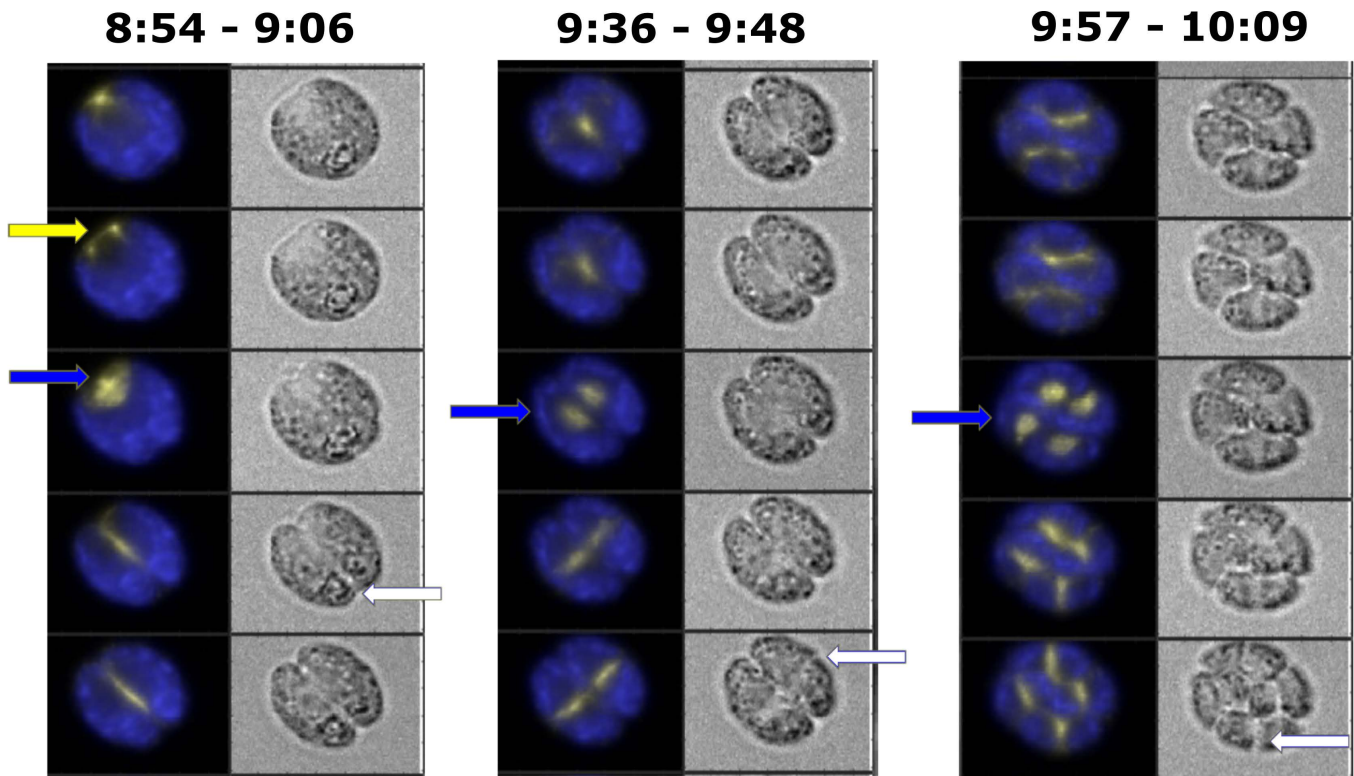

Figure 7. Live cell time lapse of wild-type EB1-NG cells with 3-min. intervals

Live cell time lapse with 3-min. intervals acquired with microscopy method 1 (see Methods section). Each cell has a brightfield image (right), and a composite of EB1-NG signal in yellow and chloroplast autofluorescence signal in blue (left). Yellow arrow: spindle pole separation. Blue arrows: new spindle formation. White arrows: new cleavage furrow formation. Time indicated on top of each strip is hours and minutes after beginning of time lapse. The indicated time corresponds to the top cell in each strip. Each subsequent cell going down is from an image captured every 3 minutes.



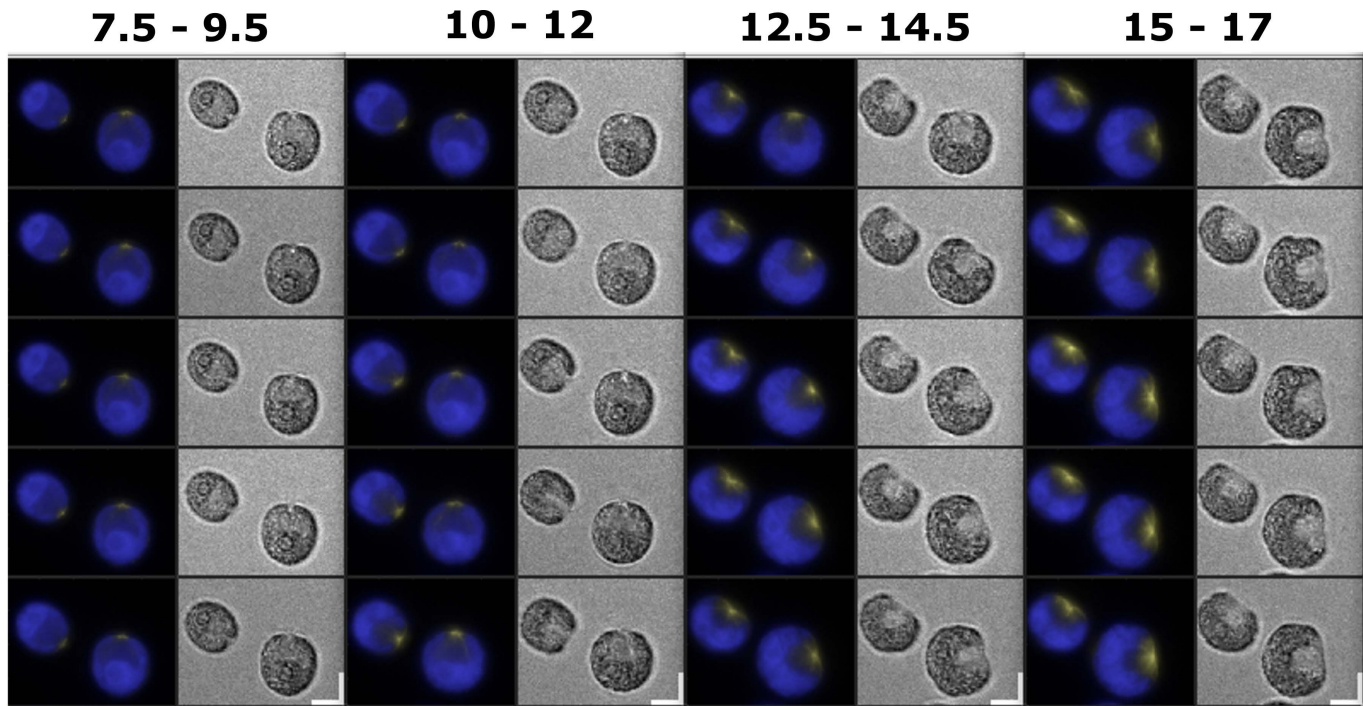

Figure 8. Live cell time lapse of *cycb1-5* EB1-NG cells

Live cell time lapse acquired with microscopy method 1 (see Methods section). Each cell has a brightfield image (right), and a composite of EB1-NG signal in yellow and chloroplast autofluorescence signal in blue (left). Time indicated on top of each strip is hours after beginning of time lapse. The indicated time corresponds to the top cell in each strip. Each subsequent cell going down is from an image captured every 30 minutes.

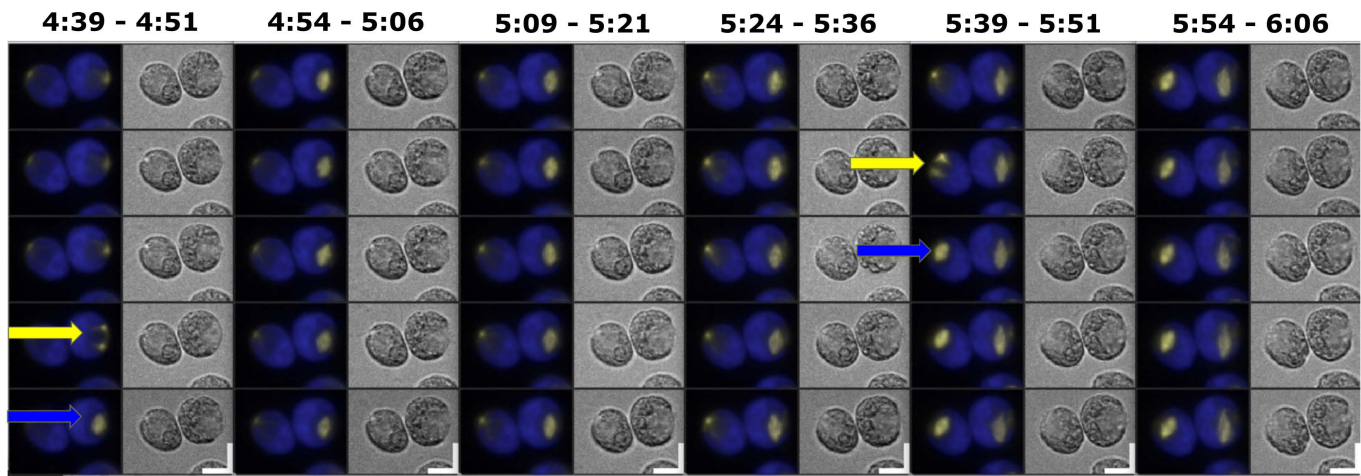

Figure 9. Live cell time lapse of *cdc27-6* EB1-NG cells

Live cell time lapse acquired with microscopy method 1 (see Methods section). Each cell has a brightfield image (right), and a composite of EB1-NG signal in yellow and chloroplast autofluorescence signal in blue (left). Yellow arrows: spindle pole separation. Blue arrows: new spindle formation. Time indicated on top of each strip is hours and minutes after beginning of time lapse. The indicated time corresponds to the top cell in each strip. Each subsequent cell going down is from an image captured every 3 minutes.



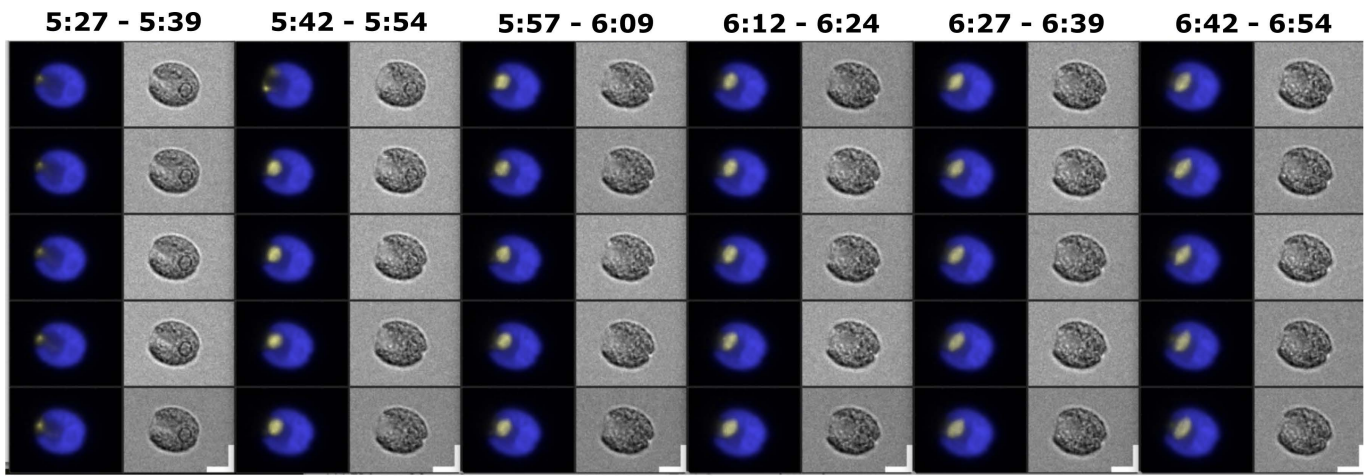

Figure 10. Live cell time lapse of *cdc20-1* EB1-NG cells

Live cell time lapse acquired with microscopy method 1 (see Methods section). Each cell has a brightfield image (right), and a composite of EB1-NG signal in yellow and chloroplast autofluorescence signal in blue (left). Time indicated on top of each strip is hours and minutes after beginning of time lapse. The indicated time corresponds to the top cell in each strip. Each subsequent cell going down is from an image captured every 3 minutes.

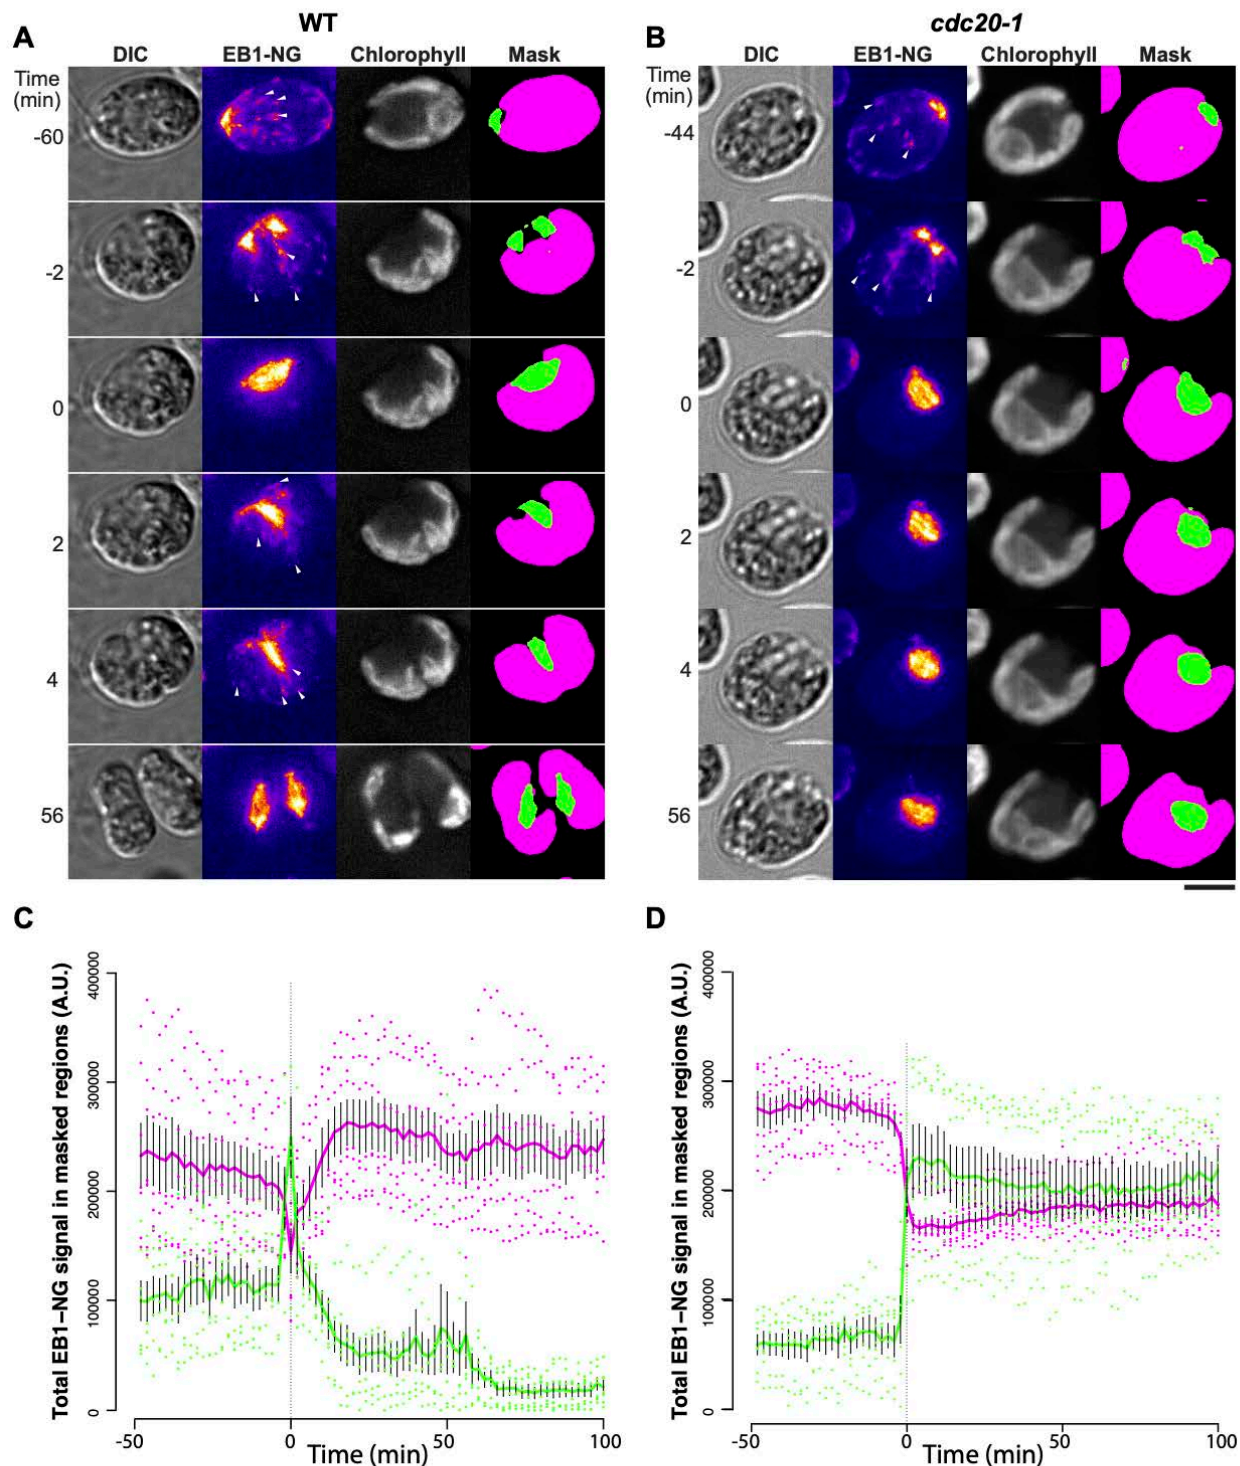

Figure 11. Suppression of cytoplasmic EB1-NG comets during mitosis.

(A, B) Representative examples of WT (A) and *cdc20-1* (B) cells expressing EB1-NG. Time-lapse microscopy was done using Method 3 (see Materials and Methods). Bar, 5  $\mu$ m. (C, D) Regions representing polar dot, spindle, and furrow (green in A, B) and cytoplasm (magenta in A, B) were masked as described in Materials and Methods. Total signals in the masked regions are presented as mean  $\pm$  SEM (N = 7), with values from individual cells overlaid as dots. Time zero (first appearance of complete spindle) was determined empirically for each cell. See Supp. Figure 3 for individual traces.

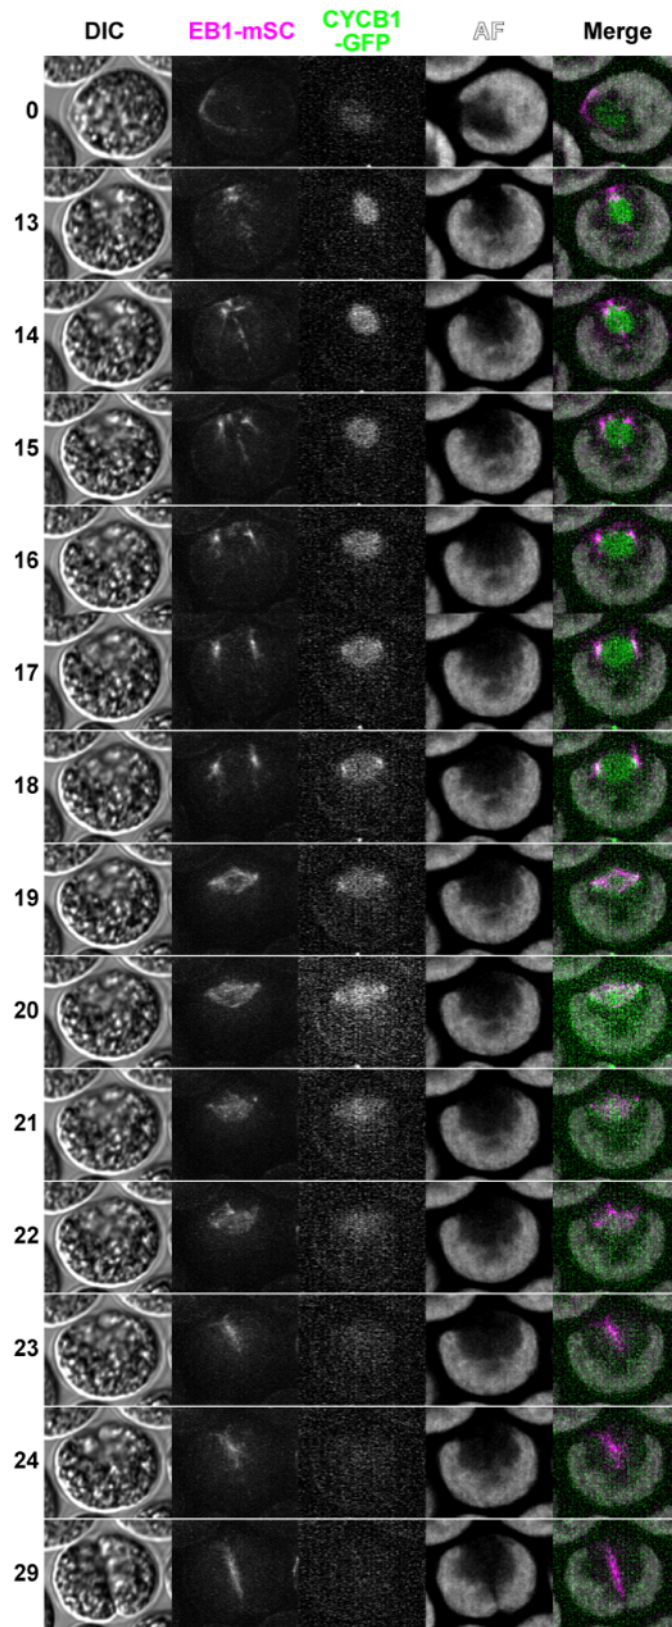

Figure 12. Live cell time lapse of CYCB1-GFP EB1-mScarlet cells with 1-min intervals

Live cell time lapse imaging was done using Method 3 (see Methods section). Imaging was done at 27 °C. Select time-frames are shown with the times indicated on the left (min.). For DIC and AF (chlorophyll autofluorescence), mid-section images are shown; for EB1-mSc, maximum projections of Z-stacks are shown; for CYCB1-GFP, maximum projections of Z-stacks after Gaussian blurring along the Z-axis are shown. Bar, 5 microns. See Supp. Video 8 for a larger field of view including this cell and the entire time-series.



## Parsed Citations

- Adachi, S., Uchimiya, H., & Umeda, M. (2006). Expression of B2-type cyclin-dependent kinase is controlled by protein degradation in *Arabidopsis thaliana*. *Plant and Cell Physiology*. <https://doi.org/10.1093/pcp/pci034>  
Google Scholar: [Author Only](#) [Title Only](#) [Author and Title](#)
- Akhmanova, A., & Steinmetz, M. O. (2008). Tracking the ends: A dynamic protein network controls the fate of microtubule tips. In *Nature Reviews Molecular Cell Biology*. <https://doi.org/10.1038/nrm2369>  
Google Scholar: [Author Only](#) [Title Only](#) [Author and Title](#)
- Atkins, K. C., & Cross, F. R. (2018). Interregulation of CDKA/CDK1 and the plant-specific cyclin-dependent kinase CDKB in control of the *Chlamydomonas* cell cycle. *Plant Cell*. <https://doi.org/10.1105/tpc.17.00759>  
Google Scholar: [Author Only](#) [Title Only](#) [Author and Title](#)
- Basu, S., Roberts, E. L., Jones, A. W., Swaffer, M. P., Snijders, A. P., & Nurse, P. (2020). The Hydrophobic Patch Directs Cyclin B to Centrosomes to Promote Global CDK Phosphorylation at Mitosis. *Current biology*: CB, 30(5), 883–892.e4. <https://doi.org/10.1016/j.cub.2019.12.053>  
Google Scholar: [Author Only](#) [Title Only](#) [Author and Title](#)
- Boruc, J., van den Daele, H., Hollunder, J., Rombauts, S., Mylle, E., Hilson, P., Inzé, D., de Veylder, L., & Russinova, E. (2010). Functional modules in the *Arabidopsis* core cell cycle binary protein-protein interaction network. *Plant Cell*. <https://doi.org/10.1105/tpc.109.073635>  
Google Scholar: [Author Only](#) [Title Only](#) [Author and Title](#)
- Breker, M., Lieberman, K., & Cross, F. R. (2018). Comprehensive discovery of cell-cycle-essential pathways in *Chlamydomonas reinhardtii*. *Plant Cell*. <https://doi.org/10.1105/tpc.18.00071>  
Google Scholar: [Author Only](#) [Title Only](#) [Author and Title](#)
- Charvin, G., Cross, F. R., & Siggia, E. D. (2008). A microfluidic device for temporally controlled gene expression and long-term fluorescent imaging in unperturbed dividing yeast cells. *PLoS ONE*. <https://doi.org/10.1371/journal.pone.0001468>  
Google Scholar: [Author Only](#) [Title Only](#) [Author and Title](#)
- Corellou, F., Camasses, A., Ligat, L., Peaucellier, G., & Bouget, F. Y. (2005). Atypical regulation of a green lineage-specific B-type cyclin-dependent kinase. *Plant Physiology*. <https://doi.org/10.1104/pp.105.059626>  
Google Scholar: [Author Only](#) [Title Only](#) [Author and Title](#)
- Cross, F. R. (2020). Regulation of Multiple Fission and Cell-Cycle-Dependent Gene Expression by CDKA1 and the Rb-E2F Pathway in *Chlamydomonas*. *Current Biology*. <https://doi.org/10.1016/j.cub.2020.03.019>  
Google Scholar: [Author Only](#) [Title Only](#) [Author and Title](#)
- Cross, F. R., & Umen, J. G. (2015). The *Chlamydomonas* cell cycle. *Plant Journal*. <https://doi.org/10.1111/tpj.12795>  
Google Scholar: [Author Only](#) [Title Only](#) [Author and Title](#)
- Di Talia, S., Skotheim, J. M., Bean, J. M., Siggia, E. D., & Cross, F. R. (2007). The effects of molecular noise and size control on variability in the budding yeast cell cycle. *Nature*, 448, 947–951. <https://doi.org/10.1038/nature06511>  
Google Scholar: [Author Only](#) [Title Only](#) [Author and Title](#)
- Ehler, L. L., Holmes, J. A., & Dutcher, S. K. (1995). Loss of spatial control of the mitotic spindle apparatus in a *Chlamydomonas reinhardtii* mutant strain lacking basal bodies. *Genetics*.  
Google Scholar: [Author Only](#) [Title Only](#) [Author and Title](#)
- Ehler, Linda L., & Dutcher, S. K. (1998). Pharmacological and genetic evidence for a role of rootlet and phycoplast microtubules in the positioning and assembly of cleavage furrows in *Chlamydomonas reinhardtii*. *Cell Motility and the Cytoskeleton*. [https://doi.org/10.1002/\(SICI\)1097-0169\(1998\)40:2<193::AID-CM8>3.0.CO;2-G](https://doi.org/10.1002/(SICI)1097-0169(1998)40:2<193::AID-CM8>3.0.CO;2-G)  
Google Scholar: [Author Only](#) [Title Only](#) [Author and Title](#)
- Glötzer, M., Murray, A. W., & Kirschner, M. W. (1991). Cyclin is degraded by the ubiquitin pathway. *Nature*, 349, 132–138. <https://doi.org/10.1038/349132a0>  
Google Scholar: [Author Only](#) [Title Only](#) [Author and Title](#)
- Harris, J. A., Liu, Y., Yang, P., Kner, P., & Lehtreck, K. F. (2016). Single-particle imaging reveals intraflagellar transport-independent transport and accumulation of EB1 in *Chlamydomonas* flagella. *Molecular Biology of the Cell*. <https://doi.org/10.1091/mbc.E15-08-0608>  
Google Scholar: [Author Only](#) [Title Only](#) [Author and Title](#)
- He, J., Chao, W. C. H., Zhang, Z., Yang, J., Cronin, N., & Barford, D. (2013). Insights into degron recognition by APC/C coactivators from the structure of an Acm1-Cdh1 complex. *Molecular Cell*. <https://doi.org/10.1016/j.molcel.2013.04.024>  
Google Scholar: [Author Only](#) [Title Only](#) [Author and Title](#)
- Heldt, F. S., Tyson, J. J., Cross, F. R., & Novák, B. (2020). A Single Light-Responsive Sizer Can Control Multiple-Fission Cycles in *Chlamydomonas*. *Current Biology*. <https://doi.org/10.1016/j.cub.2019.12.026>  
Google Scholar: [Author Only](#) [Title Only](#) [Author and Title](#)
- Ikui, A. E., Ueki, N., Pecani, K., & Cross, F. (2021). Control of pre-replicative complex during the division cycle in *Chlamydomonas*

reinhardtii. *PLOS Genetics*. <https://doi.org/10.1371/journal.pgen.1009471>

Google Scholar: [Author Only](#) [Title Only](#) [Author and Title](#)

Janke, C., & Montagnac, G. (2017). Causes and Consequences of Microtubule Acetylation. In *Current Biology*.

<https://doi.org/10.1016/j.cub.2017.10.044>

Google Scholar: [Author Only](#) [Title Only](#) [Author and Title](#)

Kearsey, S. E., & Cotterill, S. (2003). Enigmatic variations: Divergent modes of regulating eukaryotic DNA replication. In *Molecular Cell*.

[https://doi.org/10.1016/S1097-2765\(03\)00441-6](https://doi.org/10.1016/S1097-2765(03)00441-6)

Google Scholar: [Author Only](#) [Title Only](#) [Author and Title](#)

Mastop, M., Bindels, D. S., Shaner, N. C., Postma, M., Gadella, T., Jr, & Goedhart, J. (2017). Characterization of a spectrally diverse set of fluorescent proteins as FRET acceptors for mTurquoise2. *Scientific reports*, 7(1), 11999. <https://doi.org/10.1038/s41598-017-12212-x>

Google Scholar: [Author Only](#) [Title Only](#) [Author and Title](#)

Morgan, D. O. (2007). *The Cell Cycle, Principles of Control. Integrative and Comparative Biology*. <https://doi.org/10.1093/icb/icm066>

Google Scholar: [Author Only](#) [Title Only](#) [Author and Title](#)

Murray, A. W., & Kirschner, M. W. (1989). Dominoes and clocks: the union of two views of the cell cycle. *Science (New York, N.Y.)*, 246, 614–621. <https://doi.org/10.1126/science.2683077>

Google Scholar: [Author Only](#) [Title Only](#) [Author and Title](#)

Murray, A. W., Solomon, M. J., & Kirschner, M. W. (1989). The role of cyclin synthesis and degradation in the control of maturation promoting factor activity. *Nature*, 339, 280–286. <https://doi.org/10.1038/339280a0>

Google Scholar: [Author Only](#) [Title Only](#) [Author and Title](#)

Nowack, M. K., Harashima, H., Dissmeyer, N., Zhao, X., Bouyer, D., Weimer, A. K., De Winter, F., Yang, F., & Schnittger, A. (2012). Genetic Framework of Cyclin-Dependent Kinase Function in Arabidopsis. *Developmental Cell*. <https://doi.org/10.1016/j.devcel.2012.02.015>

Google Scholar: [Author Only](#) [Title Only](#) [Author and Title](#)

Onishi, M., Umen, J. G., Cross, F. R., & Pringle, J. R. (2020). Cleavage-furrow formation without F-actin in *Chlamydomonas*. *Proceedings of the National Academy of Sciences of the United States of America*. <https://doi.org/10.1073/pnas.1920337117>

Google Scholar: [Author Only](#) [Title Only](#) [Author and Title](#)

O'Toole, E. T., & Dutcher, S. K. (2014). Site-specific basal body duplication in *Chlamydomonas*. *Cytoskeleton*, 71(2), 108–118. <https://doi.org/10.1002/cm.21155>

Google Scholar: [Author Only](#) [Title Only](#) [Author and Title](#)

Pecani, K., & Cross, F. R. (2016). Degradation of the mitotic cyclin clb3 is not required for mitotic exit but is necessary for G1 cyclin control of the succeeding cell cycle. *Genetics*. <https://doi.org/10.1534/genetics.116.194837>

Google Scholar: [Author Only](#) [Title Only](#) [Author and Title](#)

Rogozin, I. B., Basu, M. K., Csürös, M., & Koonin, E. V. (2009). Analysis of Rare Genomic Changes Does Not Support the Unikont–Bikont Phylogeny and Suggests Cyanobacterial Symbiosis as the Point of Primary Radiation of Eukaryotes. *Genome Biology and Evolution*. <https://doi.org/10.1093/gbe/evp011>

Google Scholar: [Author Only](#) [Title Only](#) [Author and Title](#)

Sasabe, M., & Machida, Y. (2014). Signaling pathway that controls plant cytokinesis. In *Enzymes*. <https://doi.org/10.1016/B978-0-12-801922-1.00006-3>

Google Scholar: [Author Only](#) [Title Only](#) [Author and Title](#)

Schroda, M. (2019). Good News for Nuclear Transgene Expression in *Chlamydomonas*. *Cells*. <https://doi.org/10.3390/cells8121534>

Google Scholar: [Author Only](#) [Title Only](#) [Author and Title](#)

Thornton, B. R., & Toczyski, D. P. (2003). Securin and B-cyclin/CDK are the only essential targets of the APC. *Nature Cell Biology*. <https://doi.org/10.1038/ncb1066>

Google Scholar: [Author Only](#) [Title Only](#) [Author and Title](#)

Tulin, F., & Cross, F. R. (2014). A microbial avenue to cell cycle control in the plant superkingdom. *Plant Cell*.

<https://doi.org/10.1105/tpc.114.129312>

Google Scholar: [Author Only](#) [Title Only](#) [Author and Title](#)

Van Leene, J., Hollunder, J., Eeckhout, D., Persiau, G., Van De Slijke, E., Stals, H., Van Isterdael, G., Verkest, A., Neiryck, S., Buffel, Y., De Bodt, S., Maere, S., Laukens, K., Pharazyn, A., Ferreira, P. C. G., Eloy, N., Renne, C., Meyer, C.,

Faure, J. D., ... De Jaeger, G. (2010). Targeted interactomics reveals a complex core cell cycle machinery in *Arabidopsis thaliana*. *Molecular Systems Biology*. <https://doi.org/10.1038/msb.2010.53>

Google Scholar: [Author Only](#) [Title Only](#) [Author and Title](#)

Verde, F., Dogterom, M., Stelzer, E., Karsenti, E., & Leibler, S. (1992). Control of microtubule dynamics and length by cyclin A- and cyclin B-dependent kinases in *Xenopus* egg extracts. *The Journal of cell biology*, 118(5), 1097–1108.

<https://doi.org/10.1083/jcb.118.5.1097>

Google Scholar: [Author Only](#) [Title Only](#) [Author and Title](#)

**Wäsch, R., & Cross, F. R. (2002). APC-dependent proteolysis of the mitotic cyclin Clb2 is essential for mitotic exit. *Nature*, 418, 556–562. <https://doi.org/10.1038/nature00856>**

Google Scholar: [Author Only](#) [Title Only](#) [Author and Title](#)

**Weingartner, M., Criqui, M. C., Mészáros, T., Binarova, P., Schmit, A. C., Helfer, A., Derevier, A., Erhardt, M., Bögre, L., & Genschik, P. (2004). Expression of a nondegradable cyclin B1 affects plant development and leads to endomitosis by inhibiting the formation of a phragmoplast. *Plant Cell*. <https://doi.org/10.1105/tpc.020057>**

Google Scholar: [Author Only](#) [Title Only](#) [Author and Title](#)

**Zachariae, W., & Nasmyth, K. (1999). Whose end is destruction: Cell division and the anaphase-promoting complex. In *Genes and Development* (Vol. 13, pp. 2039–2058). <https://doi.org/10.1101/gad.13.16.2039>**

Google Scholar: [Author Only](#) [Title Only](#) [Author and Title](#)

**Zhang, S., Chang, L., Alfieri, C., Zhang, Z., Yang, J., Maslen, S., Skehel, M., & Barford, D. (2016). Molecular mechanism of APC/C activation by mitotic phosphorylation. *Nature*. <https://doi.org/10.1038/nature17973>**

Google Scholar: [Author Only](#) [Title Only](#) [Author and Title](#)
